# Supplementary material for: Randomised trials in maternal and perinatal health in low and middle-income countries from 2010 to 2019: a systematic scoping review
Source: PubMed Central journal article supplement — BMJ Open. 2022 Jul 7;12(7):e059473. doi: 10.1136/bmjopen-2021-059473 (PMC9263904; doi:10.1136/bmjopen-2021-059473), 2022-07-07
Supplement: bmjopen-2021-059473.draft_revisions.pdf [file bmjopen-2021-059473.draft_revisions.pdf]

# BMJ Open

BMJ Open is committed to open peer review. As part of this commitment we make the peer review history of every article we publish publicly available.

When an article is published we post the peer reviewers' comments and the authors' responses online. We also post the versions of the paper that were used during peer review. These are the versions that the peer review comments apply to.

The versions of the paper that follow are the versions that were submitted during the peer review process. They are not the versions of record or the final published versions. They should not be cited or distributed as the published version of this manuscript.

BMJ Open is an open access journal and the full, final, typeset and author-corrected version of record of the manuscript is available on our site with no access controls, subscription charges or pay-per-view fees (<http://bmjopen.bmj.com>).

If you have any questions on BMJ Open's open peer review process please email [info.bmjopen@bmj.com](mailto:info.bmjopen@bmj.com)

# BMJ Open

## Randomised trials in maternal and perinatal health in low- and middle-income countries from 2010 to 2019: a systematic scoping review

|                               |                                                                                                                                                                                                                                                                                                                                                                                                                                                                                                                                                                  |
|-------------------------------|------------------------------------------------------------------------------------------------------------------------------------------------------------------------------------------------------------------------------------------------------------------------------------------------------------------------------------------------------------------------------------------------------------------------------------------------------------------------------------------------------------------------------------------------------------------|
| Journal:                      | <i>BMJ Open</i>                                                                                                                                                                                                                                                                                                                                                                                                                                                                                                                                                  |
| Manuscript ID                 | bmjopen-2021-059473                                                                                                                                                                                                                                                                                                                                                                                                                                                                                                                                              |
| Article Type:                 | Original research                                                                                                                                                                                                                                                                                                                                                                                                                                                                                                                                                |
| Date Submitted by the Author: | 23-Nov-2021                                                                                                                                                                                                                                                                                                                                                                                                                                                                                                                                                      |
| Complete List of Authors:     | Eggleston, Alexander; Burnet Institute, Maternal, Child, and Adolescent Health Programme<br>Richards, Annabel; The University of Melbourne<br>Farrington, Elise; Western Health<br>Tse, Wai Chung ; Monash University<br>Williams, Jack; Monash University<br>Sella Hewage, Ayeshini; Deakin University<br>McDonald, Steve; Monash University School of Public Health and Preventive Medicine<br>Turner, Tari; Monash University School of Public Health and Preventive Medicine<br>Vogel, J; Burnet Institute, Maternal, Child, and Adolescent Health Programme |
| Keywords:                     | OBSTETRICS, Maternal medicine < OBSTETRICS, PUBLIC HEALTH                                                                                                                                                                                                                                                                                                                                                                                                                                                                                                        |
|                               |                                                                                                                                                                                                                                                                                                                                                                                                                                                                                                                                                                  |

SCHOLARONE™  
Manuscripts

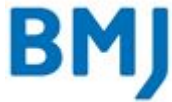

I, the Submitting Author has the right to grant and does grant on behalf of all authors of the Work (as defined in the below author licence), an exclusive licence and/or a non-exclusive licence for contributions from authors who are: i) UK Crown employees; ii) where BMJ has agreed a CC-BY licence shall apply, and/or iii) in accordance with the terms applicable for US Federal Government officers or employees acting as part of their official duties; on a worldwide, perpetual, irrevocable, royalty-free basis to BMJ Publishing Group Ltd ("BMJ") its licensees and where the relevant Journal is co-owned by BMJ to the co-owners of the Journal, to publish the Work in this journal and any other BMJ products and to exploit all rights, as set out in our [licence](#).

The Submitting Author accepts and understands that any supply made under these terms is made by BMJ to the Submitting Author unless you are acting as an employee on behalf of your employer or a postgraduate student of an affiliated institution which is paying any applicable article publishing charge ("APC") for Open Access articles. Where the Submitting Author wishes to make the Work available on an Open Access basis (and intends to pay the relevant APC), the terms of reuse of such Open Access shall be governed by a Creative Commons licence – details of these licences and which [Creative Commons](#) licence will apply to this Work are set out in our licence referred to above.

Other than as permitted in any relevant BMJ Author's Self Archiving Policies, I confirm this Work has not been accepted for publication elsewhere, is not being considered for publication elsewhere and does not duplicate material already published. I confirm all authors consent to publication of this Work and authorise the granting of this licence.

1  
2  
3  
4 Randomised trials in maternal and perinatal health in low- and middle-income  
5  
6 countries from 2010 to 2019: a systematic scoping review  
7  
8  
9

10 Alexander Eggleston<sup>1</sup>, Annabel Richards<sup>2</sup>, Elise Farrington<sup>3</sup>, Wai Chung Tse<sup>4</sup>, Jack Williams<sup>4</sup>, Ayeshini  
11 Sella Hewage<sup>5</sup>, Steve McDonald<sup>6</sup>, Tari Turner<sup>6</sup>, Joshua P Vogel<sup>1</sup>  
12  
13  
14

15 <sup>1</sup> Maternal, Child, and Adolescent Health Programme, Burnet Institute, 85 Commercial Road,  
16 Melbourne, VIC 3004, Australia  
17

18 <sup>2</sup> Melbourne University, Grattan Street, Parkville, VIC 3010, Australia  
19

20 <sup>3</sup> Western Health, Furlong Road, St Albans, VIC 3021, Australia  
21

22 <sup>4</sup> Monash University, Wellington Road, Clayton, VIC 3800, Australia  
23

24 <sup>5</sup> Deakin University, 221 Burwood Highway, Burwood, VIC 3125, Australia  
25

26 <sup>6</sup> School of Public Health and Preventive Medicine, Monash University, Level 4 553 St Kilda Road,  
27 Melbourne, VIC 3004, Australia  
28  
29

30 **Corresponding author:**  
31

32 Dr Alexander John Eggleston  
33 Burnet Institute  
34 85 Commercial Road, Melbourne  
35 VIC 3004  
36 Australia  
37 [Alex.eggleston05@gmail.com](mailto:Alex.eggleston05@gmail.com)  
38  
39

40 **Word count:** 4,079  
41  
42  
43  
44  
45  
46  
47  
48  
49  
50  
51  
52  
53  
54  
55  
56  
57  
58  
59  
60

## ABSTRACT

### Objectives

To identify and map all trials in maternal health conducted in low- and middle-income countries (LMIC) over the 10-year period 2010-2019, to identify geographical and thematic trends, as well as comparing to global causes of maternal death and pre-identified priority areas.

### Design

Systematic scoping review.

### Primary and secondary outcome measures

Extracted data included location, study characteristics and whether trials corresponded to causes of mortality and identified research priority topics.

### Results

Our search identified 7,269 articles, 874 of which were included for analysis. Between 2010 and 2019, maternal health trials conducted in LMICs more than doubled (50 to 114). Trials were conducted in 61 countries – 231 trials (26.4%) were conducted in Iran. Only 225 trials (25.7%) were aligned with a cause of maternal mortality. Within these trials, pre-existing medical conditions, embolism, obstructed labour, and sepsis were all under-represented when compared with number of maternal deaths globally. Large numbers of studies were conducted on priority topics such as labour and delivery, obstetric haemorrhage, and antenatal care. Hypertensive disorders of pregnancy, diabetes, and health systems and policy – despite being high priority topics – had relatively few trials.

### Conclusion

Despite trials conducted in LMICs increasing from 2010 to 2019, there were significant gaps in geographical distribution, alignment with causes of maternal mortality, and known research priority topics. The research gaps identified provide guidance and insight for future research conduct in low-resource settings.

### Trial registration

Registered via Open Science Framework (DOI: 10.17605/OSF.IO/QUJP5)

### Strengths and limitations of this study

- We undertook a broad, extensive search to identify as many studies as possible, utilising an RCT-specific database that draws from a wide range of other databases.
- This resulted in a large number of trials to analyse, ensuring as much as possible that overall trends found in the data were instructive and informative.
- All data was double extracted by two independent reviewers, ensuring consistency and accuracy of the individual findings.
- We acknowledge that as a review of RCTs only, not all research pertaining to maternal health is captured, and that other forms of study design are still important to the overall body of work done in any given field.
- We also acknowledge that the nature of a scoping review means that no quality assessment of trials is undertaken, and so we cannot comment on the quality of research conducted.

## BACKGROUND

In 2017, an estimated 295,000 women died worldwide during pregnancy, childbirth or the immediate postpartum period, equivalent to 211 deaths per 100,000 live births.<sup>1</sup> While this represents a near 38% reduction from the 2000 estimates, acceleration is required to meet the global Sustainable Development Goal (SDG) target of 70 deaths per 100,000 live births by 2030.<sup>1,2</sup> Based on a 2014 systematic analysis, the leading causes of maternal death include indirect causes (27.5%), obstetric haemorrhage (27.1%), hypertensive disorders (14.0%) and sepsis (10.7%).<sup>3</sup> Maternal mortality data have consistently shown that a majority of maternal deaths occur in low- and middle-income countries (LMICs), with countries in Sub-Saharan Africa and Southern Asia accounting for 86% of all maternal deaths.<sup>1,4</sup> The disparity in maternal mortality between higher- and lower-income countries is a stark example of how profound inequities in the quality of healthcare services between higher- and lower-resourced settings have tragic consequences for women, families and communities.<sup>5</sup>

Robust and reliable research is a critical component of the global effort to address the global burden of maternal death and disability, the majority of which is preventable.<sup>6</sup> Recent global research prioritization exercises have been conducted to identify the most impactful research areas to drive improvements in global maternal and perinatal health outcomes.<sup>7,8</sup> For example, the World Health Organization (WHO)-led prioritisation exercise by Souza et al in 2014 identified and prioritised 190 research questions for improving global maternal and perinatal health in the period 2015 to 2025 – suggesting eight broad topics of maternal health of importance (Box 1).<sup>7</sup> A separate prioritisation exercise by Chapman et al in 2014 on reducing maternal mortality in LMICs identified 100 high priority research questions – categorised into seven key topics (Box 1).<sup>8</sup>

### Box 1. Priority maternal health topics from global prioritisation exercises

#### **Souza et al – “Maternal and perinatal health research priorities beyond 2015: an international survey and prioritization exercise”<sup>7</sup>**

Questions identified by a reference group of experts and refined by a technical working group were given a score based on 5 criteria. Questions were given a normalised research priority score (NRPS) to determine the highest priority topics, which were as follows:

1. Labour and delivery
2. Obstetric haemorrhage
3. Neonatal care
4. Hypertensive disorders of pregnancy
5. Antenatal care
6. Abortion
7. Health systems
8. Other

#### **Chapman et al – “A survey study identified global research priorities for decreasing maternal mortality”<sup>8</sup>**

An initial list of questions derived from 178 Cochrane systematic reviews were prioritised and refined into a list of 100 questions. Thematic analysis of these questions was used to determine rank of priority by weighting within the set, with the following list of topics:

1. Health systems and policy
1. Diabetes and other causes\*
3. Abortion and unplanned pregnancy
4. Postpartum haemorrhage
5. Hypertensive disorders
6. Labour and caesarean

*\*Including HIV, malaria, anaemia, and violence*

#### **Say et al - “Global causes of maternal death: a WHO systematic analysis”<sup>3</sup>**

A WHO working group analysed specialised and general bibliographic databases, as well as the WHO mortality database for vital registration data, to identify and report estimated causes of maternal death between 2003 and 2012. Their work found that in the ‘developing regions’, the leading causes of maternal death were:

1. Obstetric haemorrhage (27.1%)
2. Pre-existing medical conditions (14.8%)
3. Hypertensive disorders (14.0%)
4. Other (11.2%)
5. Sepsis (10.7%)



6. Abortion (7.9%)
7. HIV-related (5.5%)
8. Embolism (3.1%)
9. Obstructed labour (2.9%)
10. Complications of delivery (2.8%)

Randomised controlled trials are the preferred study design for assessing effectiveness of interventions such as medicines.<sup>9</sup> They can also be used to evaluate effectiveness of more complex interventions, such as changes in health system arrangements.<sup>10</sup> A 2016 scoping review conducted by Chersich et al – which searched for maternal health intervention research conducted in LMICs on five key conditions – observed a marked rise in the number of trials published on maternal health topics between 2000 and 2012.<sup>11</sup> However, it is not known whether these trials are aligned with the major causes of maternal deaths, or aligned with the priority topics identified in global research prioritisation exercises. To our knowledge no such review has been undertaken across all aspects of maternal health. As such, we sought to assess all maternal health trials conducted in LMICs in the past 10 years to identify the overall trends, and to what degree this research addresses established maternal mortality burden and research priorities.

## METHODS

We elected to use a scoping review design as it is the preferred methodology for examining the scope, content, and knowledge gaps in a body of literature.<sup>12</sup> This was conducted in accordance with a pre-specified scoping review protocol registered via the Open Science Framework website.<sup>13</sup> Findings have been reported in compliance with Preferred Reporting Items for Systematic Reviews and Meta-Analyses (PRISMA) extension for scoping reviews (PRISMA-SCR).<sup>14</sup>

### Research ethics approval

As a systematic review of publicly available data, ethical approval was not required.

### Patient and public involvement

No patient's or members of the public were involved in the design, conduction, or dissemination of results for this paper.

### Eligibility criteria

1  
2  
3 We considered any trial conducted in or across any one or more LMICs to be eligible for this scoping  
4 review. LMICs were defined according to the World Bank classification of 2019, which identifies 139  
5 countries as LMICs.<sup>15</sup> Trials were eligible if they included women who were pregnant, in labour,  
6 giving birth or in the postpartum period (up to 42 days postpartum) and if they used any  
7 intervention primarily aimed at improving maternal or fetal health or preventing morbidity or  
8 mortality (i.e. the primary outcome/s of the study was related to maternal or fetal health or  
9 wellbeing). Trials published between 1 January 2010 and 31 December 2019 (inclusive) in any  
10 language were eligible. We included trials that were aimed at the maternal health system level if the  
11 primary outcome remained relevant to our population of interest. Classification of a study as a trial  
12 by the reviewers was based on Cochrane Handbook guidance.<sup>16</sup> Studies were excluded if they:

- 13 1. Used quasi-randomised or non-randomised designs
- 14 2. Had a primary outcome related to a different population (e.g., neonates or infants)
- 15 3. Were conducted in both high and low- and middle-income countries and presented only  
16 combined results. However, if trial results from LMICs were reported separately for LMICs  
17 and high-income countries, it was included
- 18 4. Pertained to management of infertility, early pregnancy loss or abortion, given the focus on  
19 maternal and perinatal outcomes in this review

### 20 21 22 23 24 25 26 27 28 29 30 31 32 33 34 **Literature searching and assessment of eligibility**

35 With support from an information specialist, a search strategy was devised to capture eligible  
36 studies (Supplemental Table 1). Search terms for maternal and perinatal health were derived from  
37 search strategies used by Cochrane Pregnancy and Childbirth to maintain and update their  
38 specialised register.<sup>17</sup> We consulted the search filters developed by Cochrane EPOC to identify  
39 search terms relating to LMICs.<sup>18</sup> The search strategy was applied to the Cochrane Central Register  
40 of Controlled Trials (CENTRAL), which retrieves records from PubMed/MEDLINE, Embase, CINAHL,  
41 ClinicalTrials.gov, WHO's International Clinical Trials Registry Platform (ICTRP), KoreaMed, Cochrane  
42 Review Group's Specialised Registers, and hand-searched biomedical sources.<sup>19</sup> Searching CENTRAL  
43 directly had the benefit of restricting search results to trials only, keeping the volume of citations to  
44 screen to a manageable level. Trial register records from ClinicalTrials.gov and WHO ICTRP were not  
45 included in the records retrieved from CENTRAL. The search was conducted on 1 May 2020.

46  
47  
48  
49  
50  
51  
52  
53  
54  
55  
56  
57  
58  
59  
60  
Citation management, identification of duplicates and screening articles for eligibility were  
conducted using EndNote<sup>20</sup> and Covidence<sup>21</sup>. Two reviewers independently screened titles and  
abstracts of all retrieved citations to identify those that were potentially eligible. Full texts for these

1  
2  
3 articles were accessed and assessed by two independent reviewers according to the eligibility  
4 criteria. At both steps, any disagreements were resolved through discussion or consulting a third  
5 author.  
6  
7  
8  
9

### 10 **Data collection and analysis**

11 For each included trial we extracted information on title, author, year of publication, location where  
12 trial was conducted (country and SDG region <sup>22</sup>), unit of randomisation (individual or cluster),  
13 category of intervention, intervention level (public health, community, primary care, hospital, and  
14 health system), and category of primary outcome(s). The intervention and outcome categories were  
15 adapted from Cochrane's list of 'higher-level categories for interventions and outcomes'.<sup>23</sup> For trials  
16 with more than one primary outcome, we identified a single, most appropriate outcome category  
17 through discussion and consensus amongst review authors. The level of intervention was  
18 determined based on the level of the healthcare system that the trial was primarily targeting – for  
19 example, trials recruiting women at an antenatal clinic were classified as primary care level. Public  
20 health and preventative care were defined as interventions for those in the community who were  
21 well, while home; and community care was defined as interventions for those in the community who  
22 were unwell. Based on the trial's primary objective, we tagged each trial to one of 35 maternal  
23 health topics, as well as classifying them by relevance to a cause of maternal death identified by Say  
24 et al in their global systematic analysis (Box 1).<sup>3</sup>  
25  
26  
27  
28  
29  
30  
31  
32  
33  
34  
35  
36

37 Included trials were additionally categorised into global research priority topics identified by Souza  
38 et al and Chapman et al.<sup>7,8</sup> The research priorities identified by Souza et al were ranked based on the  
39 distribution of maternal health themes across the 190 priority research questions – i.e., the theme  
40 with the most research questions was considered the highest ranked priority topic. This mirrored the  
41 process used by Chapman et al, where research topics with the greatest representation within the  
42 100 research questions, based on percentage, were given the highest rank. For each trial identified  
43 in our review, we used the variables extracted to classify it according to priority topics identified in  
44 Souza et al or Chapman et al, where possible (Box 1). All data were extracted by two independent  
45 reviewers, with results compared to ensure consistency and any disputes resolved through  
46 discussion or consultation with a third author. As this was a scoping review, we did not perform  
47 quality assessment on individual trials.  
48  
49  
50  
51  
52  
53  
54  
55  
56

57 We conducted descriptive analyses using Excel to determine frequencies of extracted variables and  
58 used line graphs to explore trends. We assessed trends over time using proportions of each variable  
59  
60

1  
2  
3 within studies available for a given year. While we initially planned to look at trends in individual  
4 countries and interventions, many had few or no datapoints.  
5  
6  
7  
8  
9  
10  
11  
12  
13  
14  
15  
16  
17  
18  
19  
20  
21  
22  
23  
24  
25  
26  
27  
28  
29  
30  
31  
32  
33  
34  
35  
36  
37  
38  
39  
40  
41  
42  
43  
44  
45  
46  
47  
48  
49  
50  
51  
52  
53  
54  
55  
56  
57  
58  
59  
60

For peer review only

## RESULTS

A total of 7,269 articles were identified in the search, from which 538 duplicates were removed, and 6,731 studies underwent title and abstract screening. This resulted in 1,369 articles for full text review. After reviewing these full texts, 874 studies were included (Supplementary File 1). The most common reasons for exclusion were conference abstracts (136 studies) and ineligible study design (87 studies). Sixty-eight full texts were unable to be located (Figure 1).

A total of 874 trials were included. The number of trials conducted in LMICs steadily increased over the 10-year period – from 50 in 2010 to 114 in 2019 (Figure 2). Across all years, 2018 had the highest number of trials (139 trials). In total, 786 (89.9%) were individually randomised trials and 88 (10.1%) were cluster-randomised trials. Trials addressed a range of health topics, the most frequent being caesarean section (81 trials, 9.3%), obstetric haemorrhage (80 trials, 9.2%), health system, resources, and infrastructure (57 trials, 6.5%), induction of labour (55 trials, 6.3%) and hypertensive disorders of pregnancy (53 trials, 6.1%). These proportions were relatively consistent over time, apart from some slight variation in trials of caesarean section (8.0% of trials in 2010, 17.1% in 2013, 9.6% in 2019) and nutrition during pregnancy (4.0% of trials in 2010, 12.4% in 2014, 4.4% in 2019).

Trials were conducted in 61 LMICs – no trials were identified from the remaining 78 LMICs (Figure 3). Iran had the highest number of trials (231 trials, 26.4%), followed by India (113 trials, 12.9%), China (58 trials, 6.6%), Egypt (47 trials, 5.4%) and Nigeria (44 trials, 5.0%). Forty countries had five or fewer trials, and 20 countries had only one trial. The SDG region with the highest number of trials was Central and Southern Asia (399 trials), accounting for nearly half of all identified trials (45.7%) (Table 1). The next highest region was Sub-Saharan Africa with 185 trials (21.2%), followed by Eastern and South-Eastern Asia with 110 trials (12.6%). Most SDG regions saw increases in the number of trials over time. For example, Eastern and South-Eastern Asia increased from 3 trials in 2010 to 22 trials in 2019, while Sub-Saharan Africa increased from 9 trials in 2010 to 33 trials in 2019.

**Table 1. Number and proportions of identified trials by Sustainable Development Goal region, 2010-2019**

| Sustainable Development Goals Region*          | Total number of trials | % of trials |
|------------------------------------------------|------------------------|-------------|
| <i>All</i>                                     | 874                    | 100%        |
| <b>Sub-Saharan Africa</b>                      | 185                    | 21.2%       |
| <b>Northern Africa and Western Asia</b>        | 95                     | 10.9%       |
| <b>Central and Southern Asia</b>               | 399                    | 45.7%       |
| <b>Eastern and South-Eastern Asia</b>          | 110                    | 12.6%       |
| <b>Latin America and the Caribbean</b>         | 70                     | 8.0%        |
| <b>Oceania</b>                                 | 1                      | 0.1%        |
| <b>Europe and Northern America<sup>+</sup></b> | 2                      | 0.2%        |
| <b>Multi-region<sup>^</sup></b>                | 12                     | 1.4%        |

\* SDG regions taken from the Sustainable Development Goals report, 2019<sup>2</sup>

+ Included in review due to some European countries classified as LMIC<sup>15</sup>

<sup>^</sup> Multi-region: studies that were conducted across more than 1 SDG region

Pharmacological interventions were the most frequent intervention studied, accounting for 33.8% of all trials (295 trials). Trials of complementary interventions (129 trials, 14.8%) were also common, which included interventions such as aromatherapy, acupuncture, and massage therapy. This was followed by educational interventions (90 trials, 10.3%), and nutritional and supplementary interventions (77 trials, 8.8%). Some intervention categories had few trials, hence change over time is not detectable. However, complementary interventions decreased from 18.0% of all trials published in 2010 (9/50), to 10.5% of all trials published in 2019 (12/114). Nutritional and supplementary interventions decreased from 16.0% of trials published in 2010 (8/50) to 6.1% of trials in 2019 (7/114). Conversely, educational interventions increased from 4.0% of trials in 2010 (2/50) to 15.8% in 2019 (18/114), and resources and infrastructure interventions increased from 4.0% of trials in 2010 (2/50) to 14.9% in 2019 (17/114).

Half of all trials within the dataset pertained to care in a health facility (448 trials, 51.3%). A further 342 trials (39.1%) were in primary care settings. The remaining trials were at health system level (60 trials, 6.9%), public health and preventative care (14 trials, 1.6%), and home and community care (10 trials, 1.1%). The proportion of trials of facility-based care decreased from 60.0% of all trials in 2010

1  
2  
3 (30/50) to 41.7% of all trials in 2019 (48/114), while trials at the health system level rose from 4.0%  
4 in 2010 (2/50) to 14.8% in 2019 (17/114).  
5  
6  
7

8 In assessing the primary outcomes of identified trials – using the predefined Cochrane list of ‘higher-  
9 level categories for interventions and outcomes’ – development of complications (124 trials, 14.2%),  
10 pain-related outcomes (92 trials, 10.5%), outcomes related to women’s knowledge, skills, or  
11 attitudes (66 trials, 7.6%), and infection-related outcomes (50 trials, 5.7%) were the most common.  
12 A large number of trials reported non-descript physiological or clinical outcomes (394 trials, 45.1%)  
13 which were categorised into the Cochrane category of ‘other physiological or clinical’. These  
14 proportions were largely consistent over time, however outcomes related to coverage of care  
15 increased from 2.0% of trials in 2010 (1/50) to 13.2% of trials in 2019 (15/114). Outcomes on  
16 woman’s knowledge, skills and attitudes increased from 0.0% of trials in 2010 (0/50) to 14.4% in  
17 2018 (16/114), whereas development of complications decreased from 22.0% of trials in 2010  
18 (11/50) to 10.5% in 2019 (12/114).  
19  
20  
21  
22  
23  
24  
25  
26  
27

### 28 **Comparison to causes of maternal mortality**

29 Of the 874 trials published between 2010 and 2019, 225 (25.7%) were aimed at preventing or  
30 managing one of the causes of maternal mortality. Of these 225 trials, 81 (36.0%) pertained to  
31 obstetric haemorrhage, 55 (24.4%) to hypertensive disorders, 38 (16.9%) to HIV, 23 (10.2%) to  
32 sepsis, 15 (6.7%) to complications of delivery, 10 (4.4%) to pre-existing medical conditions, and 3  
33 (1.3%) to obstructed labour. Table 2 describes each of these causes of death, comparing their  
34 percentage contribution to global maternal mortality against the percentage of these 225 trials. The  
35 largest discrepancy is in the pre-existing medical conditions category, causing 14.8% of maternal  
36 deaths but accounting for only 4.4% of trials. Haemorrhage, hypertensive disorders, complications of  
37 delivery and HIV-related causes all had higher proportions of research relative to their contribution  
38 to global maternal mortality. Despite accounting for 3.4% of maternal deaths globally, no trials on  
39 embolism were identified in our search.  
40  
41  
42  
43  
44  
45  
46  
47  
48  
49  
50  
51  
52  
53  
54  
55  
56  
57  
58  
59  
60

**Table 2. Relationship between contribution of a cause of mortality to maternal deaths in the 'developing regions', and research output within maternal health trials in low- and middle-income countries, 2010-2019**

| Causes of maternal mortality    | Contribution to mortality in 'developing regions'* | Number of trials (% of all trials) | Percentage of trials addressing a cause of mortality (n=225) |
|---------------------------------|----------------------------------------------------|------------------------------------|--------------------------------------------------------------|
| Abortion^                       | 7.9%                                               | N/A                                | N/A                                                          |
| Embolism                        | 3.1%                                               | 0 (0.0)                            | 0.0%                                                         |
| Haemorrhage                     | 27.1%                                              | 81 (9.3)                           | 36.0%                                                        |
| Hypertensive disorders          | 14.0%                                              | 55 (6.3)                           | 24.4%                                                        |
| Sepsis                          | 10.7%                                              | 23 (2.6)                           | 10.2%                                                        |
| Complications of delivery       | 2.8%                                               | 15 (1.7)                           | 6.7%                                                         |
| Obstructed labour               | 2.9%                                               | 3 (0.3)                            | 1.3%                                                         |
| HIV-related                     | 5.5%                                               | 38 (4.3)                           | 16.9%                                                        |
| Pre-existing medical conditions | 14.8%                                              | 10 (1.1)                           | 4.4%                                                         |
| Other                           | 11.2%                                              | 649 (74.3)                         | N/A                                                          |
| <b>Total</b>                    | <b>100.0%</b>                                      | <b>874 (100.0)</b>                 | <b>100.0%</b>                                                |

\* Mortality figures were taken from the 2014 Say et al report<sup>3</sup>

^ Abortion was excluded from this review, and hence no results are reported

N/A: Not applicable

### Comparison to research priority topics

The WHO global maternal and perinatal health research prioritisation by Souza et al 2014 identified eight priority topics (Box 1).<sup>7</sup> Amongst trials included in this review, the most frequent were trials of antenatal care interventions (333 trials, 38.1%), labour and delivery interventions (292 trials, 33.4%), and trials of interventions for obstetric haemorrhage (80 trials, 9.2%), health systems (65 trials, 7.4%), hypertensive disorders of pregnancy (54 trials, 6.2%), and other (50 trials, 5.7%) (Table 3). The greatest differences between the priority topics identified in Souza et al and trials in this review was seen in antenatal care, ranked fourth priority by Souza et al but contributing the highest proportion



of research output. The remaining priorities were approximately aligned with the research output identified in this review.

**Table 3. Maternal health trials from low- and middle-income countries (2010-2019), compared to Souza et al maternal health research priority topics<sup>7</sup>**

| Research Priority topics, as ranked by Souza et al | Number of trials (% of all trials) | Rank (based on number of trials) |
|----------------------------------------------------|------------------------------------|----------------------------------|
| 1. Labour/Delivery                                 | 292 (33.4)                         | 2                                |
| 2. Obstetric haemorrhage                           | 80 (9.2)                           | 3                                |
| 3. Neonatal care*                                  | N/A                                | N/A                              |
| 4. Hypertensive disorders of pregnancy             | 54 (6.2)                           | 5                                |
| 5. Antenatal care                                  | 333 (38.1)                         | 1                                |
| 6. Abortion*                                       | N/A                                | N/A                              |
| 7. Health systems                                  | 65 (7.4)                           | 4                                |
| 8. Other                                           | 50 (5.7)                           | 6                                |
| <b>Total</b>                                       | <b>874 (100.0)</b>                 |                                  |

\* Categories were excluded from this review and hence no results are reported

N/A: Not applicable

A similar analysis was performed for the research priority topics identified by Chapman et al (Box 1).<sup>8</sup> In total, 245 trials (28.0%) were not related to one of the categories described by Chapman et al. Aside from these, the most frequent category was labour and caesarean section (292 trials, 33.4%), followed by diabetes and other causes (140 trials, 16.0%), postpartum haemorrhage (80 trials, 9.2%), health policy and systems (63 trials, 7.2%), and hypertensive disorders (54 trials, 6.2%) (Table 4). The volume of trial research was almost completely inverted against priority research topics identified by Chapman et al. For example, the lowest ranked Chapman et al priority topic (labour and delivery) accounted for the highest proportion of research output. Relatively few trials were available for some categories.

**Table 4. Maternal health trials from low- and middle-income countries (2010-2019), compared to Chapman et al maternal health research priority topics<sup>8</sup>**

| Theme, as ranked by Chapman et al                | Number of trials<br>(% of all trials) | Rank<br>(based on number of trials) |
|--------------------------------------------------|---------------------------------------|-------------------------------------|
| 1. Health policy and system                      | 63 (7.2)                              | 5                                   |
| 1. Diabetes and other causes <sup>^</sup>        | 140 (16.0)                            | 3                                   |
| 3. Abortion and unplanned pregnancy <sup>*</sup> | N/A                                   | N/A                                 |
| 4. Postpartum haemorrhage                        | 80 (9.2)                              | 4                                   |
| 5. Hypertensive disorders                        | 54 (6.2)                              | 6                                   |
| 6. Labour and caesarean                          | 292 (33.4)                            | 1                                   |
| <i>Other</i> <sup>†</sup>                        | 245 (28.0)                            | 2                                   |
| <b>Total</b>                                     | <b>874 (100.0)</b>                    |                                     |

<sup>^</sup> Other causes include HIV, Malaria, Anaemia, Violence

<sup>\*</sup> Category was excluded from this review and hence no results are reported

<sup>†</sup> Other was not a reported result from the Chapman et al paper, it has been used to capture any studies that did not fit one of the above categories

N/A: Not applicable

## DISCUSSION

### Summary of main findings

A total of 874 trials in maternal health were conducted in LMICs between 2010 and 2019, with a steady increase in trials each year until 2018. Pharmacological interventions accounted for a third of all trials. Nearly half (45.7%) of trials were conducted in Central and Southern Asian countries, and, importantly, of the 139 countries classified as LMIC<sup>15</sup>, only 61 had at least one maternal health trial over this ten-year period. Most trials were conducted at facility or primary care levels (51.3% and 39.1% respectively). Only a quarter of trials explicitly targeted one of the major causes of maternal mortality. Within these studies, trials of pre-existing medical conditions (such as cardiac or endocrine diseases<sup>3</sup>) and embolism were under-represented relative to their contribution to the global maternal mortality burden. On comparison of our findings to two global research prioritisation exercises by Souza et al and Chapman et al – gaps were identified for research priority topics such as health systems, hypertensive disorders of pregnancy, and obstetric haemorrhage. Comparatively, a substantial number of trials addressed antenatal care and labour/delivery topics. These findings suggest that trials conducted in LMICs are not well-aligned with either the burden of mortality or identified research priority topics.

### Interpretation

To our knowledge this is the first systematic scoping review to describe the characteristics of maternal health trials conducted in LMICs during 2010 to 2019. In 2016 Chersich et al published a broad review of the publication of studies (of any design) from LMICs between 2000 and 2012 on five health conditions – haemorrhage, hypertension, malaria, HIV and other sexually transmitted infections – as well as health systems strengthening.<sup>24</sup> They reported that the number of articles published per year more than doubled over this time period, from an average of 92 studies between 2000 and 2003 to 237 studies between 2008 and 2012. In line with this, the number of trials increased from 66 trials in the 2000-2003 period to 119 trials in the 2008-2012 period. However, Chersich et al reported that the proportion of studies that were trials declined due to the more rapid increase in systematic reviews, qualitative studies, and mixed-methods studies. This is broadly similar to our findings, where the number of trials had more than doubled by 2018. The apparent decrease to 114 trials in 2019 might reflect a time lag between publication and inclusion in bibliographic databases, though this is not certain. The rate of increase in published trials is similar to that described by Bornmann et al in their 2015 analysis of research studies published across all scientific fields – they reported that in recent decades the number of cited references approximately doubles every 9 years.<sup>25</sup>

1  
2  
3  
4  
5 Iran, an upper-middle income country of nearly 83 million people, was the largest country in terms  
6 of maternal health trial output, contributing over 26% of all trials. This was considerably higher than  
7 the second-largest country, India, with 13% of trials. For the period 2010 to 2019, Iran's trial output  
8 increased from 8 trials a year to a peak of 51 trials in 2018. The global trend of increasing number of  
9 trials annually was similar even when excluding trials from Iran. Interestingly, the rapid increase in  
10 Iran's output is in contrast to the Chersich et al review, which assessed studies from 2000 to 2012  
11 and did not identify Iran within the top five countries in terms of publications.<sup>24</sup> A 2019 report by  
12 Stanford University identified that across all scientific fields, publication output from Iran increased  
13 dramatically from approximately 1,000 studies in 1997 to over 50,000 studies in 2018.<sup>26</sup> The authors  
14 hypothesised that the combination of increased graduate student numbers, combined with  
15 government policies regarding publication requirements for graduation and promotion, have driven  
16 this rapid increase.  
17  
18  
19  
20  
21  
22  
23  
24  
25

26 Consistent with scoping review methodology, we did not conduct quality assessment of individual  
27 trials and are unable to determine whether there are differences in study quality across countries.  
28 However, we note that concerns regarding quality of randomized trials are increasingly frequent  
29 across a range of health areas. For example, a 2019 analysis of 1,082 retracted publications  
30 estimated that 2.5 retractions occur for every 10,000 papers globally, though this rate was highest  
31 for studies from Iran (15.52 per 10,000), Egypt (11.75 per 10,000) and China (8.26 per 10,000  
32 papers).<sup>27</sup> A separate 2019 study of retracted articles from open-access journals found that Iran was  
33 one of the top four contributors globally, alongside China, India and the USA.<sup>28</sup> In a future analysis of  
34 this database, we intend to appraise the quality of identified trials to explore possible differences.  
35  
36  
37  
38  
39  
40  
41  
42

43 Over 90% of trials were conducted at either a facility or primary care level, a finding consistent with  
44 Chersich et al, in which only 5% of studies involved a community service component.<sup>24</sup> This is not  
45 surprising considering that larger-scale trials of health system or community-wide interventions are  
46 often more challenging and resource-intensive. The increase in trials of health system level  
47 interventions from two studies in 2010 to 17 studies in 2019 is suggestive of greater effort in  
48 evaluating more complex interventions to improve maternal health outcomes.  
49  
50  
51  
52  
53

54 Overall, there is a substantial mismatch between the areas being addressed in trials, leading causes  
55 of maternal mortality and priority research topics. Our finding that only a quarter of trials in LMICs  
56 are addressing a cause of maternal mortality, despite the maternal death burden, indicates that  
57  
58  
59  
60

1  
2  
3 greater investment and research focused on leading causes of maternal death is required,  
4 particularly on under-evaluated topics such as pre-existing medical conditions, obstructed labour,  
5 and embolism. Additionally, our finding that available trials are not closely aligned with identified  
6 priority topics suggests that more effort is needed to ensure that research activities would benefit  
7 from being better targeted to agreed global priorities.  
8  
9  
10  
11  
12

### 13 **Strengths and limitations**

14 We undertook a broad, inclusive search with screening in duplicate for eligible studies conducted  
15 according to a pre-specified review protocol. While it is possible that some trials were not identified,  
16 we benefited from the Cochrane CENTRAL database of randomised trials, and hence consider the  
17 risk of missing studies to be low. We acknowledge that, after extensive efforts, we were unable to  
18 locate the full text for 68 of the trials initially identified. We observed that a majority of these were  
19 from journals not currently indexed in PubMed.  
20  
21  
22  
23  
24  
25

26 We opted to focus on randomised trials only, considering their importance in evidence-based  
27 practice and evaluating the effects of interventions. However, we acknowledge that this review is  
28 limited in that other types of study designs – non-randomised interventional studies, qualitative  
29 studies, and mixed-methods studies – are also integral to clinical research and improving maternal  
30 health outcomes globally. As such, the trends on trial publication reported here may not be  
31 applicable to trends in other types of research output. Another limitation was the exclusion of  
32 important reproductive health topics such as contraception, pre-conception health, fertility  
33 treatment and abortion, as well as care of newborns in the postnatal period. While these are  
34 important health areas, we opted to focus on antenatal, intrapartum, and postpartum care of the  
35 woman to keep this review to a manageable size and scope. A similar, future analysis of trials from  
36 LMICs on these health topics would be important in identifying whether similar trends exist.  
37  
38  
39  
40  
41  
42  
43  
44  
45  
46

### 47 **Implications for practice, policy, and research**

48 Substantial global targets have been set for improving maternal health and well-being by 2030.<sup>29</sup>  
49 Conducting more and better trials to drive improvements in clinical care is a critical part of efforts to  
50 achieve those goals.<sup>30</sup> Our findings can guide maternal health researchers and research funding  
51 organisations to identify and address overlooked priority topics. This includes LMICs where no  
52 maternal health trials were identified, or maternal health conditions (such as pre-existing conditions)  
53 where too few trials have been conducted. Where significant numbers of trials are underway, such  
54 as individual countries or maternal health topics, reflection on the benefit and necessity of new  
55  
56  
57  
58  
59  
60

1  
2  
3 research may provide impetus for re-alignment to areas of greater need. This database of  
4 randomized trials will be used to conduct further analyses of the maternal health trial literature,  
5 such as exploring variations in study quality between countries and bibliometric analyses to identify  
6 the most impactful individuals, institutions, and collaborations.  
7  
8  
9  
10  
11  
12  
13  
14  
15  
16  
17  
18  
19  
20  
21  
22  
23  
24  
25  
26  
27  
28  
29  
30  
31  
32  
33  
34  
35  
36  
37  
38  
39  
40  
41  
42  
43  
44  
45  
46  
47  
48  
49  
50  
51  
52  
53  
54  
55  
56  
57  
58  
59  
60

For peer review only

## CONCLUSION

While the volume of maternal health trials in LMICs has steadily increased over the 10-year period from 2010 to 2019, there remains a deficit of trials addressing important causes of maternal mortality. Topics such as pre-existing medical conditions and embolism, as well as the previously identified priority topics of haemorrhage, hypertensive disorders of pregnancy, and diabetes in pregnancy, remain relatively under-represented. On a geographical level, the majority of trial output is from a small number of countries, with nearly 40% of studies emanating from only two of the 139 LMIC countries. These findings suggest that a different approach to selecting topics for trials of maternal health interventions in LMICs may be required – one where trial research is more focused on high-burden conditions and high-priority health issues. Findings can also aid researchers and funding agencies to identify current research gaps for further investment and improve allocation of resources for research.

**CONTRIBUTORSHIP STATEMENT**

AE, JPV and TT developed the review protocol and data extraction tools. AE and SMcD developed the search strategy. AE and AR conducted title/abstract and full-text screening, while AE, AR, EF, WCT, JW and AA conducted data extraction. AE prepared the first draft of the analysis, which was reviewed by all authors and revised following their input. All named authors contributed to the writing of this manuscript.

**ACKNOWLEDGMENTS**

None

**COMPETING INTERESTS**

The authors declare no competing interests.

**FUNDING**

JPV is supported by a National Health and Medical Research Council Investigator Grant (GNT1194248).

**DATA SHARING STATEMENT**

Dataset available from the Dryad repository, DOI: (awaiting contact from Dryad).



1  
2  
3 **FIGURES**  
4

5 **Figure 1.** PRISMA flow chart of screening process

6 **Figure 2.** Number of maternal health trials in low- and middle-income countries by year of  
7 publication (2010-2019)  
8

9 **Figure 3.** Number of identified maternal health trials per low- and middle-income country  
10  
11  
12  
13  
14  
15  
16  
17  
18  
19  
20  
21  
22  
23  
24  
25  
26  
27  
28  
29  
30  
31  
32  
33  
34  
35  
36  
37  
38  
39  
40  
41  
42  
43  
44  
45  
46  
47  
48  
49  
50  
51  
52  
53  
54  
55  
56  
57  
58  
59  
60

For peer review only

## REFERENCES

1. World Health Organization. Trends in maternal mortality 2000 to 2017: estimates by WHO, UNICEF, UNFPA, World Bank Group and the United Nations Population Division. Geneva, 2019.
2. United Nations. Sustainable Development Goals Report. New York, United States of America: United Nations, 2019.
3. Say L, Chou D, Gemmill A, et al. Global causes of maternal death: a WHO systematic analysis. *The Lancet Global health* 2014;2(6):e323-33. doi: [https://dx.doi.org/10.1016/S2214-109X\(14\)70227-X](https://dx.doi.org/10.1016/S2214-109X(14)70227-X)
4. Alkema L, Chou D, Hogan D, et al. Global, regional, and national levels and trends in maternal mortality between 1990 and 2015, with scenario-based projections to 2030: a systematic analysis by the UN Maternal Mortality Estimation Inter-Agency Group. *Lancet (London, England)* 2016;387(10017):462-74. doi: [https://dx.doi.org/10.1016/S0140-6736\(15\)00838-7](https://dx.doi.org/10.1016/S0140-6736(15)00838-7)
5. Graham W, Woodd S, Byass P, et al. Diversity and divergence: the dynamic burden of poor maternal health. *Lancet (London, England)* 2016;388(10056):2164-75. doi: [https://dx.doi.org/10.1016/S0140-6736\(16\)31533-1](https://dx.doi.org/10.1016/S0140-6736(16)31533-1)
6. World Health Organization. Strategies toward ending preventable maternal mortality (EPMM). Geneva, Switzerland: WHO, 2015.
7. Souza JP, Widmer M, Gulmezoglu AM, et al. Maternal and perinatal health research priorities beyond 2015: an international survey and prioritization exercise. *Reprod Health* 2014;11:61. doi: 10.1186/1742-4755-11-61 [published Online First: 2014/08/08]
8. Chapman E, Reveiz L, Sangalang S, et al. A survey study identified global research priorities for decreasing maternal mortality. *Journal of Clinical Epidemiology* 2014;67(3):314-24. doi: <https://doi.org/10.1016/j.jclinepi.2013.10.007>
9. CEBM. Centre for Evidence Based Medicine [cited 2020 May 1]. Available from: <https://www.cebm.net/> accessed May 1 2020.
10. Eccles M, Grimshaw J, Campbell M, et al. Research designs for studies evaluating the effectiveness of change and improvement strategies. *Qual Saf Health Care* 2003;12(1):47-52. doi: 10.1136/qhc.12.1.47 [published Online First: 2003/02/07]
11. Chersich M, Blaauw D, Dumbaugh M, et al. Mapping of research on maternal health interventions in low- and middle-income countries: a review of 2292 publications between 2000 and 2012. *Global Health* 2016;12(1):52. doi: 10.1186/s12992-016-0189-1 [published Online First: 2016/09/08]
12. Munn Z, Peters MDJ, Stern C, et al. Systematic review or scoping review? Guidance for authors when choosing between a systematic or scoping review approach. *BMC medical research methodology* 2018;18(1):143. doi: <https://dx.doi.org/10.1186/s12874-018-0611-x>
13. Eggleston AV, J.; Turner, T. Randomised trials in maternal and perinatal health in low- and middle-income countries from 2010-2019: a systematic scoping review 2020 [Available from: [osf.io/wcrph](https://osf.io/wcrph) accessed October 2 2021].
14. Tricco AC, Lillie E, Zarin W, et al. PRISMA Extension for Scoping Reviews (PRISMA-ScR): Checklist and Explanation. *Annals of internal medicine* 2018;169(7):467-73. doi: <https://dx.doi.org/10.7326/M18-0850>

15. World Bank Group. Low & middle income: The World Bank Group; 2019 [updated 2019; cited 2020 25 March]. Available from: <https://data.worldbank.org/income-level/low-and-middle-income> accessed 25 March 2020.
16. Higgins J TJ, Chandler J, Cumpston M, Li T, Page MJ, Welch VA. Cochrane Handbook for Systematic Reviews of Interventions: Cochrane, 2019.
17. Cochrane Pregnancy and Childbirth. Cochrane Pregnancy and Childbirth's Trials Register: The Cochrane Collaboration; 2020 [cited 2021 November 8]. Available from: <https://pregnancy.cochrane.org/pregnancy-and-childbirth-groups-trials-register> accessed March 2020.
18. Cochrane Effective Practice and Organisation of Care. LMIC Filters: The Cochrane Collaboration; 2020 [cited 2021 November 8]. Available from: <https://epoc.cochrane.org/lmic-filters> accessed March 2020.
19. Cochrane Library. Cochrane Central Register of Controlled Trials (CENTRAL) United Kingdom: Cochrane; 2020 [cited 2020 October 14]. Available from: <https://www.cochrane.org/contact> accessed October 14 2020.
20. Web of Science Group. EndNote USA: Clarivate; 2020 [cited 2020 October 14]. Available from: <https://endnote.com/> accessed October 14 2020.
21. Covidence. About Covidence Australia2020 [cited 2020 October 14]. Available from: <https://www.covidence.org/> accessed October 14 2020.
22. United Nations Statistics Division. SDG Indicators: Regional groupings used in Report and Statistical Annex New York, USA: United Nations; 2020 [cited 2020 June 15]. Available from: <https://unstats.un.org/sdgs/indicators/regional-groups> accessed June 15 2020.
23. Cochrane Linked Data. Metadata and vocabularies London, UK: The Cochrane Collaboration; 2020 [cited 2020 June 15]. Available from: <https://linkeddata.cochrane.org/linked-data-project/metadata-and-vocabularies> accessed June 15 2020.
24. Centre for Health Policy. Report on systematic review of health system, health promotion and clinical interventions for improving maternal health in low- and middle-income countries: MASCOT, 2013.
25. Bornmann L, Mutz R. Growth rates of modern science: A bibliometric analysis based on the number of publications and cited references. *Journal of the Association for Information Science and Technology* 2015;66(11):2215-22.
26. Sadeh S, Mirramezani M, Mesgaran MB, et al. The Scientific Output of Iran: Quantity, Quality, and Corruption. 2019
27. Campos-Varela I, Ruano-Raviña A. Misconduct as the main cause for retraction. A descriptive study of retracted publications and their authors. *Gaceta sanitaria* 2019;33:356-60.
28. Wang T, Xing Q-R, Wang H, et al. Retracted publications in the biomedical literature from open access journals. *Science and engineering ethics* 2019;25(3):855-68.
29. United Nations. Goal 3: Ensure healthy lives and promote well-being for all at all ages Geneva, Switzerland: United Nations; 2015 [cited 2020 29 April]. Available from: <https://www.un.org/sustainabledevelopment/health/> accessed 29 April 2020 2020.
30. World Health Organization, Światowa Organizacja Zdrowia. Research for Universal Health Coverage: World Health Organization 2013

1  
2  
3  
4  
5  
6  
7  
8  
9  
10  
11  
12  
13  
14  
15  
16  
17  
18  
19  
20  
21  
22  
23  
24  
25  
26  
27  
28  
29  
30  
31  
32  
33  
34  
35  
36  
37  
38  
39  
40  
41  
42  
43  
44  
45  
46  
47  
48  
49  
50  
51  
52  
53  
54  
55  
56  
57  
58  
59  
60

For peer review only

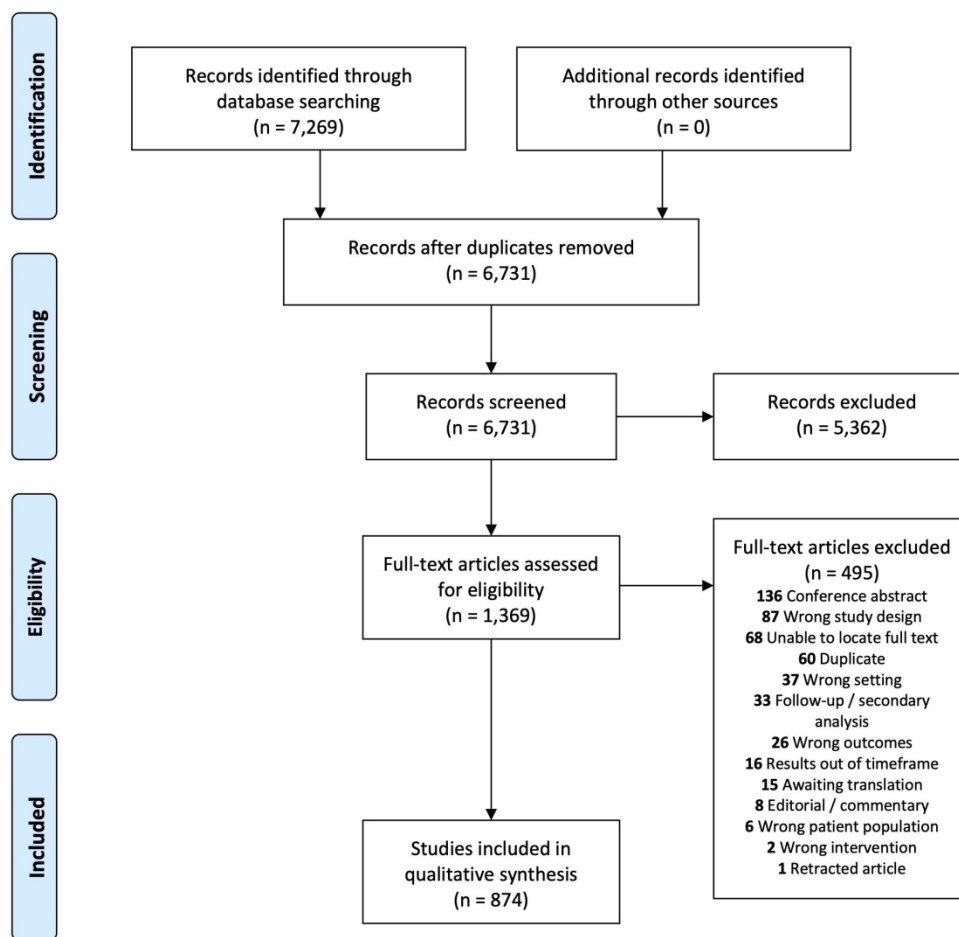

Figure 1. PRISMA flow chart of screening process

92x89mm (600 x 600 DPI)

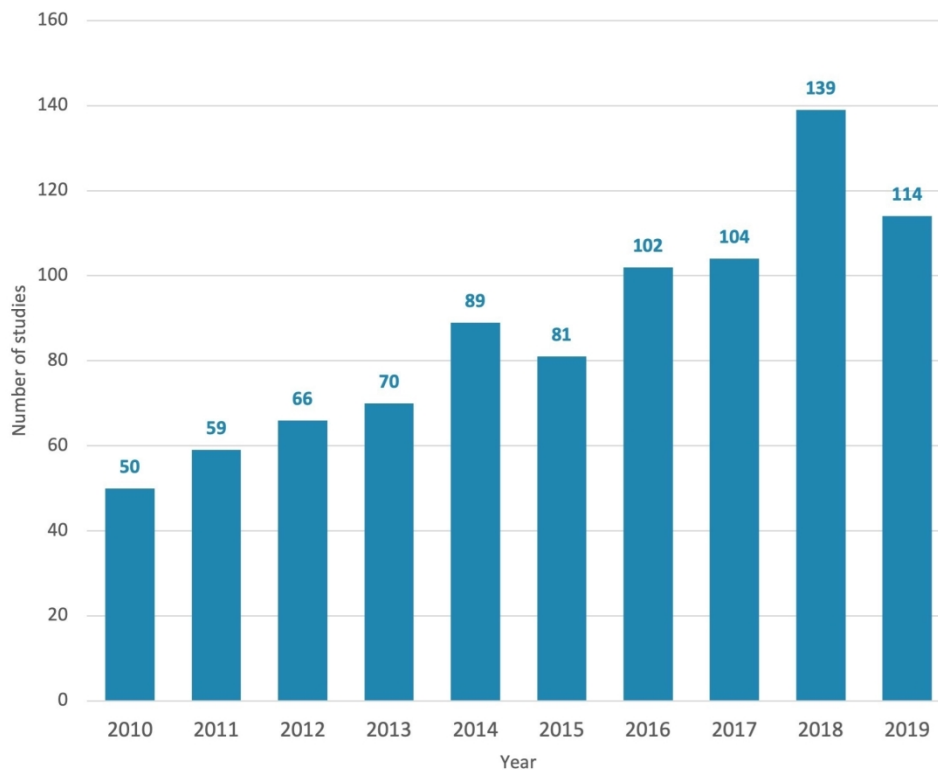

Figure 2. Number of maternal health trials in low- and middle-income countries by year of publication (2010-2019)

86x69mm (600 x 600 DPI)

1  
2  
3  
4  
5  
6  
7  
8  
9  
10  
11  
12  
13  
14  
15  
16  
17  
18  
19  
20  
21  
22  
23  
24  
25  
26  
27  
28  
29  
30  
31  
32  
33  
34  
35  
36  
37  
38  
39  
40  
41  
42  
43  
44  
45  
46  
47  
48  
49  
50  
51  
52  
53  
54  
55  
56  
57  
58  
59  
60

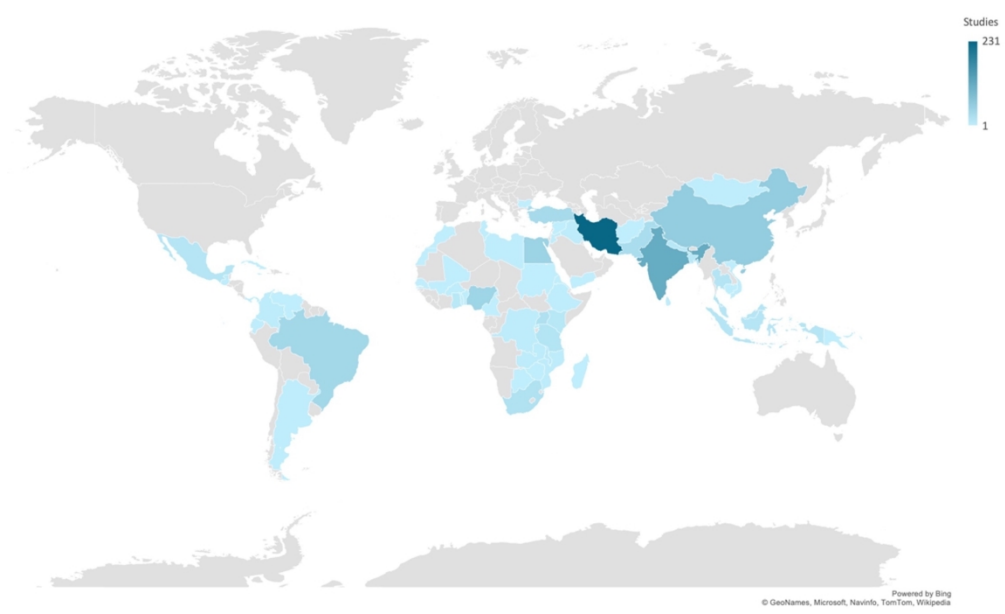

Figure 3. Number of identified maternal health trials per low- and middle-income country  
140x84mm (600 x 600 DPI)

**Supplemental Table 1. Full search strategy employed to identify all maternal health trials in low- and middle-income countries. Strategy was applied to CENTRAL database on 1 May 2020**

| ID | Search                                                                                                                                                                                                                                                                                                                                                                                                                                                                                                                                                                                                                                                                                                                                                                                                                                                                                                         |
|----|----------------------------------------------------------------------------------------------------------------------------------------------------------------------------------------------------------------------------------------------------------------------------------------------------------------------------------------------------------------------------------------------------------------------------------------------------------------------------------------------------------------------------------------------------------------------------------------------------------------------------------------------------------------------------------------------------------------------------------------------------------------------------------------------------------------------------------------------------------------------------------------------------------------|
| #1 | ((Afghanistan or Albania or Algeria or Angola or Antigua or Barbuda or Argentina or Armenia or Armenian or Aruba or Azerbaijan or Bahrain or Bangladesh or Barbados or Benin or Byelarus or Byelorussian or Belarus or Belorussian or Belorussia or Belize or Bhutan or Bolivia or Bosnia or Herzegovina or Hercegovina or Botswana or Brasil or Brazil or Bulgaria or "Burkina Faso" or "Burkina Fasso" or "Upper Volta" or Burundi or Urundi or Cambodia or "Khmer Republic" or Kampuchea or Cameroon or Cameroons or Cameron or Camerons or "Cape Verde" or "Central African Republic" or Chad or Chile or China or Colombia or Comoros or "Comoro Islands" or Comores or Mayotte or Congo or Zaire or "Costa Rica" or "Cote d'Ivoire" or "Ivory Coast" or Croatia or Cuba or Cyprus or Czechoslovakia or "Czech Republic" or Slovakia or "Slovak Republic")):ti,ab,kw (Word variations have been searched) |
| #2 | ((Africa or Asia or Caribbean or "West Indies" or "South America" or "Latin America" or "Central America")):ti,ab,kw (Word variations have been searched)                                                                                                                                                                                                                                                                                                                                                                                                                                                                                                                                                                                                                                                                                                                                                      |
| #3 | ((Djibouti or "French Somaliland" or Dominica or "Dominican Republic" or "East Timor" or "East Timur" or "Timor Leste" or Ecuador or Egypt or "United Arab Republic" or "El Salvador" or Eritrea or Estonia or Ethiopia or Fiji or Gabon or "Gabonese Republic" or Gambia or Gaza or Georgia or Georgian or Ghana or "Gold Coast" or Greece or Grenada or Guatemala or Guinea or Guam or Guiana or Guyana or Haiti or Honduras or Hungary or India or Maldives or Indonesia or Iran or Iraq or "Isle of Man" or Jamaica or Jordan or Kazakhstan or Kazakh or Kenya or Kiribati or Korea or Kosovo or Kyrgyzstan or Kirghizia or "Kyrgyz Republic" or Kirghiz or Kirgizstan or "Lao PDR" or Laos or Latvia or Lebanon or Lesotho or Basutoland or Liberia or Libya or Lithuania)):ti,ab,kw                                                                                                                      |
| #4 | ((Macedonia or Madagascar or "Malagasy Republic" or Malaysia or Malaya or Malay or Sabah or Sarawak or Malawi or Nyasaland or Mali or Malta or "Marshall Islands" or Mauritania or Mauritius or "Agalega Islands" or Mexico or Micronesia or "Middle East" or Moldova or Moldovia or Moldovian or Mongolia or Montenegro or Morocco or Ifni or Mozambique or Myanmar or Myanma or Burma or Namibia or Nepal or "Netherlands Antilles" or "New Caledonia" or Nicaragua or Niger or Nigeria or "Northern Mariana Islands" or Oman or Muscat or Pakistan or Palau or Palestine or                                                                                                                                                                                                                                                                                                                                 |



|     |                                                                                                                                                                                                                                                                                                                                                                                                                                                                                                                                                                                                                                                                                                                                                                                                                                                                                                                                                                                        |
|-----|----------------------------------------------------------------------------------------------------------------------------------------------------------------------------------------------------------------------------------------------------------------------------------------------------------------------------------------------------------------------------------------------------------------------------------------------------------------------------------------------------------------------------------------------------------------------------------------------------------------------------------------------------------------------------------------------------------------------------------------------------------------------------------------------------------------------------------------------------------------------------------------------------------------------------------------------------------------------------------------|
|     | Panama or Paraguay or Peru or Philippines or Philipines or Phillipines or Phillippines or Poland or Portugal or "Puerto Rico")):ti,ab,kw                                                                                                                                                                                                                                                                                                                                                                                                                                                                                                                                                                                                                                                                                                                                                                                                                                               |
| #5  | ((Romania or Rumania or Roumania or Russia or Russian or Rwanda or Ruanda or "Saint Kitts" or "St Kitts" or Nevis or "Saint Lucia" or "St Lucia" or "Saint Vincent" or "St Vincent" or Grenadines or Samoa or "Samoa Islands" or "Navigator Island" or "Navigator Islands" or "Sao Tome" or "Saudi Arabia" or Senegal or Serbia or Montenegro or Seychelles or "Sierra Leone" or Slovenia or "Sri Lanka" or Ceylon or "Solomon Islands" or Somalia or Sudan or Suriname or Surinam or Swaziland or Syria or Tajikistan or Tadjhikistan or Tadjikistan or Tadjhik or Tanzania or Thailand or Togo or "Togolese Republic" or Tonga or Trinidad or Tobago or Tunisia or Turkey or Turkmenistan or Turkmen or Uganda or Ukraine or Uruguay or USSR or "Soviet Union" or "Union of Soviet Socialist Republics" or Uzbekistan or Uzbek or Vanuatu or "New Hebrides" or Venezuela or Vietnam or "Viet Nam" or "West Bank" or Yemen or Yugoslavia or Zambia or Zimbabwe or Rhodesia)):ti,ab,kw |
| #6  | ((developing or less* NEXT developed or "under developed" or underdeveloped or "middle income" or low* NEXT income or underserved or "under served" or deprived or poor*) NEXT (countr* or nation* or population* or world)):ti,ab,kw                                                                                                                                                                                                                                                                                                                                                                                                                                                                                                                                                                                                                                                                                                                                                  |
| #7  | ((developing or less* NEXT developed or "under developed" or underdeveloped or "middle income" or low* NEXT income) NEXT (economy or economies)):ti,ab,kw                                                                                                                                                                                                                                                                                                                                                                                                                                                                                                                                                                                                                                                                                                                                                                                                                              |
| #8  | (low* NEXT (gdp or gnp or "gross domestic" or "gross national")):ti,ab,kw                                                                                                                                                                                                                                                                                                                                                                                                                                                                                                                                                                                                                                                                                                                                                                                                                                                                                                              |
| #9  | ((low NEAR/3 middle NEAR/3 countr*)):ti,ab,kw                                                                                                                                                                                                                                                                                                                                                                                                                                                                                                                                                                                                                                                                                                                                                                                                                                                                                                                                          |
| #10 | ((lmic or lmics or "third world" or "lami country" or "lami countries")):ti,ab,kw                                                                                                                                                                                                                                                                                                                                                                                                                                                                                                                                                                                                                                                                                                                                                                                                                                                                                                      |
| #11 | ((("transitional country" or "transitional countries")):ti,ab,kw                                                                                                                                                                                                                                                                                                                                                                                                                                                                                                                                                                                                                                                                                                                                                                                                                                                                                                                       |
| #12 | (#1 OR #2 OR #3 OR #4 OR #5 OR #6 OR #7 OR #8 OR #9 OR #10 OR #11)                                                                                                                                                                                                                                                                                                                                                                                                                                                                                                                                                                                                                                                                                                                                                                                                                                                                                                                     |
| #13 | "Pregnancy and Childbirth":crg (Word variations have been searched)                                                                                                                                                                                                                                                                                                                                                                                                                                                                                                                                                                                                                                                                                                                                                                                                                                                                                                                    |
| #14 | #12 and #13 with Publication Year from 2009 to 2019, in Trials                                                                                                                                                                                                                                                                                                                                                                                                                                                                                                                                                                                                                                                                                                                                                                                                                                                                                                                         |
| #15 | MeSH descriptor: <sup>17</sup> explode all trees                                                                                                                                                                                                                                                                                                                                                                                                                                                                                                                                                                                                                                                                                                                                                                                                                                                                                                                                       |
| #16 | MeSH descriptor: [Pregnancy Complications] explode all trees                                                                                                                                                                                                                                                                                                                                                                                                                                                                                                                                                                                                                                                                                                                                                                                                                                                                                                                           |
| #17 | MeSH descriptor: [Infant, Newborn] explode all trees                                                                                                                                                                                                                                                                                                                                                                                                                                                                                                                                                                                                                                                                                                                                                                                                                                                                                                                                   |
| #18 | MeSH descriptor: [Fetus] explode all trees                                                                                                                                                                                                                                                                                                                                                                                                                                                                                                                                                                                                                                                                                                                                                                                                                                                                                                                                             |
| #19 | MeSH descriptor: [Fetal Development] explode all trees                                                                                                                                                                                                                                                                                                                                                                                                                                                                                                                                                                                                                                                                                                                                                                                                                                                                                                                                 |
| #20 | MeSH descriptor: [Heart Rate, Fetal] explode all trees                                                                                                                                                                                                                                                                                                                                                                                                                                                                                                                                                                                                                                                                                                                                                                                                                                                                                                                                 |
| #21 | MeSH descriptor: [Extraembryonic Membranes] explode all trees                                                                                                                                                                                                                                                                                                                                                                                                                                                                                                                                                                                                                                                                                                                                                                                                                                                                                                                          |
| #22 | MeSH descriptor: [Placenta] explode all trees                                                                                                                                                                                                                                                                                                                                                                                                                                                                                                                                                                                                                                                                                                                                                                                                                                                                                                                                          |

|     |                                                                                                                                                                                                                                                                                                                                                                                                                                                                                                     |
|-----|-----------------------------------------------------------------------------------------------------------------------------------------------------------------------------------------------------------------------------------------------------------------------------------------------------------------------------------------------------------------------------------------------------------------------------------------------------------------------------------------------------|
| 1   |                                                                                                                                                                                                                                                                                                                                                                                                                                                                                                     |
| 2   |                                                                                                                                                                                                                                                                                                                                                                                                                                                                                                     |
| 3   |                                                                                                                                                                                                                                                                                                                                                                                                                                                                                                     |
| 4   |                                                                                                                                                                                                                                                                                                                                                                                                                                                                                                     |
| 5   |                                                                                                                                                                                                                                                                                                                                                                                                                                                                                                     |
| 6   |                                                                                                                                                                                                                                                                                                                                                                                                                                                                                                     |
| 7   |                                                                                                                                                                                                                                                                                                                                                                                                                                                                                                     |
| 8   |                                                                                                                                                                                                                                                                                                                                                                                                                                                                                                     |
| 9   |                                                                                                                                                                                                                                                                                                                                                                                                                                                                                                     |
| 10  |                                                                                                                                                                                                                                                                                                                                                                                                                                                                                                     |
| 11  |                                                                                                                                                                                                                                                                                                                                                                                                                                                                                                     |
| 12  |                                                                                                                                                                                                                                                                                                                                                                                                                                                                                                     |
| 13  |                                                                                                                                                                                                                                                                                                                                                                                                                                                                                                     |
| 14  |                                                                                                                                                                                                                                                                                                                                                                                                                                                                                                     |
| 15  |                                                                                                                                                                                                                                                                                                                                                                                                                                                                                                     |
| 16  |                                                                                                                                                                                                                                                                                                                                                                                                                                                                                                     |
| 17  |                                                                                                                                                                                                                                                                                                                                                                                                                                                                                                     |
| 18  |                                                                                                                                                                                                                                                                                                                                                                                                                                                                                                     |
| 19  |                                                                                                                                                                                                                                                                                                                                                                                                                                                                                                     |
| 20  |                                                                                                                                                                                                                                                                                                                                                                                                                                                                                                     |
| 21  |                                                                                                                                                                                                                                                                                                                                                                                                                                                                                                     |
| 22  |                                                                                                                                                                                                                                                                                                                                                                                                                                                                                                     |
| 23  |                                                                                                                                                                                                                                                                                                                                                                                                                                                                                                     |
| 24  |                                                                                                                                                                                                                                                                                                                                                                                                                                                                                                     |
| 25  |                                                                                                                                                                                                                                                                                                                                                                                                                                                                                                     |
| 26  |                                                                                                                                                                                                                                                                                                                                                                                                                                                                                                     |
| 27  |                                                                                                                                                                                                                                                                                                                                                                                                                                                                                                     |
| 28  |                                                                                                                                                                                                                                                                                                                                                                                                                                                                                                     |
| 29  |                                                                                                                                                                                                                                                                                                                                                                                                                                                                                                     |
| 30  |                                                                                                                                                                                                                                                                                                                                                                                                                                                                                                     |
| 31  |                                                                                                                                                                                                                                                                                                                                                                                                                                                                                                     |
| 32  |                                                                                                                                                                                                                                                                                                                                                                                                                                                                                                     |
| 33  |                                                                                                                                                                                                                                                                                                                                                                                                                                                                                                     |
| 34  |                                                                                                                                                                                                                                                                                                                                                                                                                                                                                                     |
| 35  |                                                                                                                                                                                                                                                                                                                                                                                                                                                                                                     |
| 36  |                                                                                                                                                                                                                                                                                                                                                                                                                                                                                                     |
| 37  |                                                                                                                                                                                                                                                                                                                                                                                                                                                                                                     |
| 38  |                                                                                                                                                                                                                                                                                                                                                                                                                                                                                                     |
| 39  |                                                                                                                                                                                                                                                                                                                                                                                                                                                                                                     |
| 40  |                                                                                                                                                                                                                                                                                                                                                                                                                                                                                                     |
| 41  |                                                                                                                                                                                                                                                                                                                                                                                                                                                                                                     |
| 42  |                                                                                                                                                                                                                                                                                                                                                                                                                                                                                                     |
| 43  |                                                                                                                                                                                                                                                                                                                                                                                                                                                                                                     |
| 44  |                                                                                                                                                                                                                                                                                                                                                                                                                                                                                                     |
| 45  |                                                                                                                                                                                                                                                                                                                                                                                                                                                                                                     |
| 46  |                                                                                                                                                                                                                                                                                                                                                                                                                                                                                                     |
| 47  |                                                                                                                                                                                                                                                                                                                                                                                                                                                                                                     |
| 48  |                                                                                                                                                                                                                                                                                                                                                                                                                                                                                                     |
| 49  |                                                                                                                                                                                                                                                                                                                                                                                                                                                                                                     |
| 50  |                                                                                                                                                                                                                                                                                                                                                                                                                                                                                                     |
| 51  |                                                                                                                                                                                                                                                                                                                                                                                                                                                                                                     |
| 52  |                                                                                                                                                                                                                                                                                                                                                                                                                                                                                                     |
| 53  |                                                                                                                                                                                                                                                                                                                                                                                                                                                                                                     |
| 54  |                                                                                                                                                                                                                                                                                                                                                                                                                                                                                                     |
| 55  |                                                                                                                                                                                                                                                                                                                                                                                                                                                                                                     |
| 56  |                                                                                                                                                                                                                                                                                                                                                                                                                                                                                                     |
| 57  |                                                                                                                                                                                                                                                                                                                                                                                                                                                                                                     |
| 58  |                                                                                                                                                                                                                                                                                                                                                                                                                                                                                                     |
| 59  |                                                                                                                                                                                                                                                                                                                                                                                                                                                                                                     |
| 60  |                                                                                                                                                                                                                                                                                                                                                                                                                                                                                                     |
| #23 | MeSH descriptor: [Placental Function Tests] explode all trees                                                                                                                                                                                                                                                                                                                                                                                                                                       |
| #24 | MeSH descriptor: [Uterine Monitoring] explode all trees                                                                                                                                                                                                                                                                                                                                                                                                                                             |
| #25 | MeSH descriptor: [Pelvimetry] explode all trees                                                                                                                                                                                                                                                                                                                                                                                                                                                     |
| #26 | MeSH descriptor: [Oxytocics] explode all trees                                                                                                                                                                                                                                                                                                                                                                                                                                                      |
| #27 | MeSH descriptor: [Tocolytic Agents] explode all trees                                                                                                                                                                                                                                                                                                                                                                                                                                               |
| #28 | MeSH descriptor: [Tocolysis] explode all trees                                                                                                                                                                                                                                                                                                                                                                                                                                                      |
| #29 | MeSH descriptor: [Maternal Health Services] explode all trees                                                                                                                                                                                                                                                                                                                                                                                                                                       |
| #30 | MeSH descriptor: [Peripartum Period] explode all trees                                                                                                                                                                                                                                                                                                                                                                                                                                              |
| #31 | MeSH descriptor: [Parity] explode all trees                                                                                                                                                                                                                                                                                                                                                                                                                                                         |
| #32 | MeSH descriptor: [Perinatal Care] explode all trees                                                                                                                                                                                                                                                                                                                                                                                                                                                 |
| #33 | MeSH descriptor: [Postpartum Period] explode all trees                                                                                                                                                                                                                                                                                                                                                                                                                                              |
| #34 | MeSH descriptor: [Labor Pain] explode all trees                                                                                                                                                                                                                                                                                                                                                                                                                                                     |
| #35 | MeSH descriptor: [Anesthesia, Obstetrical] explode all trees                                                                                                                                                                                                                                                                                                                                                                                                                                        |
| #36 | MeSH descriptor: [Obstetric Surgical Procedures] explode all trees                                                                                                                                                                                                                                                                                                                                                                                                                                  |
| #37 | MeSH descriptor: [Analgesia, Obstetrical] explode all trees                                                                                                                                                                                                                                                                                                                                                                                                                                         |
| #38 | MeSH descriptor: [Obstetric Nursing] explode all trees                                                                                                                                                                                                                                                                                                                                                                                                                                              |
| #39 | MeSH descriptor: [Maternal-Child Nursing] explode all trees                                                                                                                                                                                                                                                                                                                                                                                                                                         |
| #40 | MeSH descriptor: [Midwifery] explode all trees                                                                                                                                                                                                                                                                                                                                                                                                                                                      |
| #41 | MeSH descriptor: [Apgar Score] explode all trees                                                                                                                                                                                                                                                                                                                                                                                                                                                    |
| #42 | MeSH descriptor: [Breast Feeding] explode all trees                                                                                                                                                                                                                                                                                                                                                                                                                                                 |
| #43 | MeSH descriptor: [Bottle Feeding] explode all trees                                                                                                                                                                                                                                                                                                                                                                                                                                                 |
| #44 | MeSH descriptor: [Milk, Human] explode all trees                                                                                                                                                                                                                                                                                                                                                                                                                                                    |
| #45 | {OR #15-#44}                                                                                                                                                                                                                                                                                                                                                                                                                                                                                        |
| #46 | (pregnan* or fetus or foetus or fetal or foetal or newborn or "new born" or birth or childbirth or laboring or labour* or antepart* or prenatal* or antenatal* or perinatal* or postnatal* or postpart* or caesar* or cesar* or obstetric* or tocoly* or oxytoci* or placent* or parturi* or preeclamp* or eclamp* or intrapart* or puerper* or episiotom* or amnio* or matern* or gestation* or lactati* or breastfe* or breast NEXT fe* or preconcept* or periconcept* or interconcept*):ti,ab,kw |
| #47 | #45 OR #46                                                                                                                                                                                                                                                                                                                                                                                                                                                                                          |
| #48 | (PubMed):an                                                                                                                                                                                                                                                                                                                                                                                                                                                                                         |
| #49 | (Embase):an                                                                                                                                                                                                                                                                                                                                                                                                                                                                                         |
| #50 | (CTgov):an                                                                                                                                                                                                                                                                                                                                                                                                                                                                                          |

|     |                                                                                           |
|-----|-------------------------------------------------------------------------------------------|
| #51 | (ICTRP):an                                                                                |
| #52 | #12 AND #45 AND #48 with Publication Year from 2010 to 2019, in Trials                    |
| #53 | #48 OR #49 OR #50 OR #51                                                                  |
| #54 | (pregnan*):kw                                                                             |
| #55 | (#12 AND #54 AND #49) NOT #52 with Publication Year from 2010 to 2019, in Trials          |
| #56 | (#12 AND #47 AND #49) NOT (#52 OR #55) with Publication Year from 2010 to 2019, in Trials |
| #57 | (#12 AND #47) NOT #53 with Publication Year from 2010 to 2019, in Trials                  |
| #58 | #52 OR #55 OR #56 OR #57 with Publication Year from 2010 to 2019, in Trials               |

### Notes on the search

The search was run in phases to prioritise screening. The final set (#58) comprised MeSH and free-text terms related to LMICs (#12) with a publication year of 2010–2019, separated into the following phases:

|              |                                                                        |             |
|--------------|------------------------------------------------------------------------|-------------|
| #52          | PubMed records indexed with relevant MeSH terms for pregnancy          | 2606        |
| #55          | Embase records indexed with pregnan* as a keyword term                 | 1883        |
| #56          | PubMed or Embase records with relevant free-text terms for pregnancy   | 2617        |
| #57          | Records from other sources with relevant free-text terms for pregnancy | 213         |
| <b>Total</b> |                                                                        | <b>7269</b> |

Trial register records from ClinicalTrials.gov and WHO ICTRP were not included in the retrieved records.

## Preferred Reporting Items for Systematic reviews and Meta-Analyses extension for Scoping Reviews (PRISMA-ScR) Checklist

| SECTION                                               | ITEM | PRISMA-ScR CHECKLIST ITEM                                                                                                                                                                                                                                                                                  | REPORTED ON PAGE # |
|-------------------------------------------------------|------|------------------------------------------------------------------------------------------------------------------------------------------------------------------------------------------------------------------------------------------------------------------------------------------------------------|--------------------|
| <b>TITLE</b>                                          |      |                                                                                                                                                                                                                                                                                                            |                    |
| Title                                                 | 1    | Identify the report as a scoping review.                                                                                                                                                                                                                                                                   | 1                  |
| <b>ABSTRACT</b>                                       |      |                                                                                                                                                                                                                                                                                                            |                    |
| Structured summary                                    | 2    | Provide a structured summary that includes (as applicable): background, objectives, eligibility criteria, sources of evidence, charting methods, results, and conclusions that relate to the review questions and objectives.                                                                              | 2                  |
| <b>INTRODUCTION</b>                                   |      |                                                                                                                                                                                                                                                                                                            |                    |
| Rationale                                             | 3    | Describe the rationale for the review in the context of what is already known. Explain why the review questions/objectives lend themselves to a scoping review approach.                                                                                                                                   | 4-6                |
| Objectives                                            | 4    | Provide an explicit statement of the questions and objectives being addressed with reference to their key elements (e.g., population or participants, concepts, and context) or other relevant key elements used to conceptualize the review questions and/or objectives.                                  | 4-6                |
| <b>METHODS</b>                                        |      |                                                                                                                                                                                                                                                                                                            |                    |
| Protocol and registration                             | 5    | Indicate whether a review protocol exists; state if and where it can be accessed (e.g., a Web address); and if available, provide registration information, including the registration number.                                                                                                             | 6                  |
| Eligibility criteria                                  | 6    | Specify characteristics of the sources of evidence used as eligibility criteria (e.g., years considered, language, and publication status), and provide a rationale.                                                                                                                                       | 6-7                |
| Information sources*                                  | 7    | Describe all information sources in the search (e.g., databases with dates of coverage and contact with authors to identify additional sources), as well as the date the most recent search was executed.                                                                                                  | 7                  |
| Search                                                | 8    | Present the full electronic search strategy for at least 1 database, including any limits used, such that it could be repeated.                                                                                                                                                                            | SF1                |
| Selection of sources of evidence†                     | 9    | State the process for selecting sources of evidence (i.e., screening and eligibility) included in the scoping review.                                                                                                                                                                                      | 7                  |
| Data charting process‡                                | 10   | Describe the methods of charting data from the included sources of evidence (e.g., calibrated forms or forms that have been tested by the team before their use, and whether data charting was done independently or in duplicate) and any processes for obtaining and confirming data from investigators. | 8                  |
| Data items                                            | 11   | List and define all variables for which data were sought and any assumptions and simplifications made.                                                                                                                                                                                                     | 8                  |
| Critical appraisal of individual sources of evidence§ | 12   | If done, provide a rationale for conducting a critical appraisal of included sources of evidence; describe the methods used and how this information was used in any data synthesis (if appropriate).                                                                                                      | NA                 |

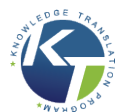

| SECTION                                       | ITEM | PRISMA-ScR CHECKLIST ITEM                                                                                                                                                                       | REPORTED ON PAGE # |
|-----------------------------------------------|------|-------------------------------------------------------------------------------------------------------------------------------------------------------------------------------------------------|--------------------|
| Synthesis of results                          | 13   | Describe the methods of handling and summarizing the data that were charted.                                                                                                                    | 8                  |
| <b>RESULTS</b>                                |      |                                                                                                                                                                                                 |                    |
| Selection of sources of evidence              | 14   | Give numbers of sources of evidence screened, assessed for eligibility, and included in the review, with reasons for exclusions at each stage, ideally using a flow diagram.                    | 9; Figure 1        |
| Characteristics of sources of evidence        | 15   | For each source of evidence, present characteristics for which data were charted and provide the citations.                                                                                     | 9                  |
| Critical appraisal within sources of evidence | 16   | If done, present data on critical appraisal of included sources of evidence (see item 12).                                                                                                      | NA                 |
| Results of individual sources of evidence     | 17   | For each included source of evidence, present the relevant data that were charted that relate to the review questions and objectives.                                                           | 9-14               |
| Synthesis of results                          | 18   | Summarize and/or present the charting results as they relate to the review questions and objectives.                                                                                            | 9-14               |
| <b>DISCUSSION</b>                             |      |                                                                                                                                                                                                 |                    |
| Summary of evidence                           | 19   | Summarize the main results (including an overview of concepts, themes, and types of evidence available), link to the review questions and objectives, and consider the relevance to key groups. | 15-17              |
| Limitations                                   | 20   | Discuss the limitations of the scoping review process.                                                                                                                                          | 18                 |
| Conclusions                                   | 21   | Provide a general interpretation of the results with respect to the review questions and objectives, as well as potential implications and/or next steps.                                       | 19                 |
| <b>FUNDING</b>                                |      |                                                                                                                                                                                                 |                    |
| Funding                                       | 22   | Describe sources of funding for the included sources of evidence, as well as sources of funding for the scoping review. Describe the role of the funders of the scoping review.                 | 20                 |

JB1 = Joanna Briggs Institute; PRISMA-ScR = Preferred Reporting Items for Systematic reviews and Meta-Analyses extension for Scoping Reviews.

\* Where *sources of evidence* (see second footnote) are compiled from, such as bibliographic databases, social media platforms, and Web sites.

† A more inclusive/heterogeneous term used to account for the different types of evidence or data sources (e.g., quantitative and/or qualitative research, expert opinion, and policy documents) that may be eligible in a scoping review as opposed to only studies. This is not to be confused with *information sources* (see first footnote).

‡ The frameworks by Arksey and O'Malley (6) and Levac and colleagues (7) and the JB1 guidance (4, 5) refer to the process of data extraction in a scoping review as data charting.

§ The process of systematically examining research evidence to assess its validity, results, and relevance before using it to inform a decision. This term is used for items 12 and 19 instead of "risk of bias" (which is more applicable to systematic reviews of interventions) to include and acknowledge the various sources of evidence that may be used in a scoping review (e.g., quantitative and/or qualitative research, expert opinion, and policy document).

From: Tricco AC, Lillie E, Zarin W, O'Brien KK, Colquhoun H, Levac D, et al. PRISMA Extension for Scoping Reviews (PRISMAScR): Checklist and Explanation. *Ann Intern Med.* 2018;169:467–473. doi: 10.7326/M18-0850.

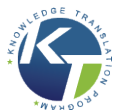

St. Michael's

Inspired Care. For peer review only - <http://bmjopen.bmj.com/site/about/guidelines.xhtml>  
Inspiring Science.

# BMJ Open

## Randomised trials in maternal and perinatal health in low- and middle-income countries from 2010 to 2019: a systematic scoping review

|                                 |                                                                                                                                                                                                                                                                                                                                                                                                                                                                                                                                                                  |
|---------------------------------|------------------------------------------------------------------------------------------------------------------------------------------------------------------------------------------------------------------------------------------------------------------------------------------------------------------------------------------------------------------------------------------------------------------------------------------------------------------------------------------------------------------------------------------------------------------|
| Journal:                        | <i>BMJ Open</i>                                                                                                                                                                                                                                                                                                                                                                                                                                                                                                                                                  |
| Manuscript ID                   | bmjopen-2021-059473.R1                                                                                                                                                                                                                                                                                                                                                                                                                                                                                                                                           |
| Article Type:                   | Original research                                                                                                                                                                                                                                                                                                                                                                                                                                                                                                                                                |
| Date Submitted by the Author:   | 30-Mar-2022                                                                                                                                                                                                                                                                                                                                                                                                                                                                                                                                                      |
| Complete List of Authors:       | Eggleston, Alexander; Burnet Institute, Maternal, Child, and Adolescent Health Programme<br>Richards, Annabel; The University of Melbourne<br>Farrington, Elise; Western Health<br>Tse, Wai Chung ; Monash University<br>Williams, Jack; Monash University<br>Sella Hewage, Ayeshini; Deakin University<br>McDonald, Steve; Monash University School of Public Health and Preventive Medicine<br>Turner, Tari; Monash University School of Public Health and Preventive Medicine<br>Vogel, J; Burnet Institute, Maternal, Child, and Adolescent Health Programme |
| <b>Primary Subject Heading</b>: | Global health                                                                                                                                                                                                                                                                                                                                                                                                                                                                                                                                                    |
| Secondary Subject Heading:      | Obstetrics and gynaecology, Public health                                                                                                                                                                                                                                                                                                                                                                                                                                                                                                                        |
| Keywords:                       | OBSTETRICS, Maternal medicine < OBSTETRICS, PUBLIC HEALTH                                                                                                                                                                                                                                                                                                                                                                                                                                                                                                        |
|                                 |                                                                                                                                                                                                                                                                                                                                                                                                                                                                                                                                                                  |

SCHOLARONE™  
Manuscripts



I, the Submitting Author has the right to grant and does grant on behalf of all authors of the Work (as defined in the below author licence), an exclusive licence and/or a non-exclusive licence for contributions from authors who are: i) UK Crown employees; ii) where BMJ has agreed a CC-BY licence shall apply, and/or iii) in accordance with the terms applicable for US Federal Government officers or employees acting as part of their official duties; on a worldwide, perpetual, irrevocable, royalty-free basis to BMJ Publishing Group Ltd ("BMJ") its licensees and where the relevant Journal is co-owned by BMJ to the co-owners of the Journal, to publish the Work in this journal and any other BMJ products and to exploit all rights, as set out in our [licence](#).

The Submitting Author accepts and understands that any supply made under these terms is made by BMJ to the Submitting Author unless you are acting as an employee on behalf of your employer or a postgraduate student of an affiliated institution which is paying any applicable article publishing charge ("APC") for Open Access articles. Where the Submitting Author wishes to make the Work available on an Open Access basis (and intends to pay the relevant APC), the terms of reuse of such Open Access shall be governed by a Creative Commons licence – details of these licences and which [Creative Commons](#) licence will apply to this Work are set out in our licence referred to above.

Other than as permitted in any relevant BMJ Author's Self Archiving Policies, I confirm this Work has not been accepted for publication elsewhere, is not being considered for publication elsewhere and does not duplicate material already published. I confirm all authors consent to publication of this Work and authorise the granting of this licence.

1  
2  
3  
4 Randomised trials in maternal and perinatal health in low- and middle-income  
5  
6 countries from 2010 to 2019: a systematic scoping review  
7  
8  
9

10 Alexander Eggleston<sup>1</sup>, Annabel Richards<sup>2</sup>, Elise Farrington<sup>3</sup>, Wai Chung Tse<sup>4</sup>, Jack Williams<sup>4</sup>, Ayeshini  
11 Sella Hewage<sup>5</sup>, Steve McDonald<sup>6</sup>, Tari Turner<sup>6</sup>, Joshua P. Vogel<sup>1</sup>  
12  
13  
14

15 <sup>1</sup> Maternal, Child, and Adolescent Health Programme, Burnet Institute, 85 Commercial Road,  
16 Melbourne, VIC 3004, Australia  
17

18 <sup>2</sup> Melbourne University, Grattan Street, Parkville, VIC 3010, Australia  
19

20 <sup>3</sup> Western Health, Furlong Road, St Albans, VIC 3021, Australia  
21

22 <sup>4</sup> Monash University, Wellington Road, Clayton, VIC 3800, Australia  
23

24 <sup>5</sup> Deakin University, 221 Burwood Highway, Burwood, VIC 3125, Australia  
25

26 <sup>6</sup> School of Public Health and Preventive Medicine, Monash University, Level 4 553 St Kilda Road,  
27 Melbourne, VIC 3004, Australia  
28  
29

30 **Corresponding author:**  
31

32 Dr Alexander John Eggleston  
33 Burnet Institute  
34 85 Commercial Road, Melbourne  
35 VIC 3004  
36 Australia  
37 [Alex.eggleston05@gmail.com](mailto:Alex.eggleston05@gmail.com)  
38  
39

40 **Word count:** 4,198  
41  
42  
43  
44  
45  
46  
47  
48  
49  
50  
51  
52  
53  
54  
55  
56  
57  
58  
59  
60



## ABSTRACT

### Objectives

To identify and map all trials in maternal health conducted in low- and middle-income countries (LMIC) over the 10-year period 2010-2019, to identify geographical and thematic trends, as well as comparing to global causes of maternal death and pre-identified priority areas.

### Design

Systematic scoping review.

### Primary and secondary outcome measures

Extracted data included location, study characteristics and whether trials corresponded to causes of mortality and identified research priority topics.

### Results

We searched the Cochrane Central Register of Controlled Trials (CENTRAL) database, a combined registry of trials from multiple sources. Our search identified 7,269 articles, 874 of which were included for analysis. Between 2010 and 2019, maternal health trials conducted in LMICs more than doubled (50 to 114). Trials were conducted in 61 countries – 231 trials (26.4%) were conducted in Iran. Only 225 trials (25.7%) were aligned with a cause of maternal mortality. Within these trials, pre-existing medical conditions, embolism, obstructed labour, and sepsis were all under-represented when compared with number of maternal deaths globally. Large numbers of studies were conducted on priority topics such as labour and delivery, obstetric haemorrhage, and antenatal care. Hypertensive disorders of pregnancy, diabetes, and health systems and policy – despite being high priority topics – had relatively few trials.

### Conclusion

Despite trials conducted in LMICs increasing from 2010 to 2019, there were significant gaps in geographical distribution, alignment with causes of maternal mortality, and known research priority topics. The research gaps identified provide guidance and insight for future research conduct in low-resource settings.

### Trial registration

Registered via Open Science Framework (DOI: 10.17605/OSF.IO/QUJP5)

### Strengths and limitations of this study

- We undertook a broad, extensive search to identify as many trials as possible, utilising a trial-specific database that draws from a wide range of other databases.
- This resulted in a large number of trials to analyse, ensuring as much as possible that overall trends found in the data were instructive and informative.
- All data were double extracted by two independent reviewers, ensuring consistency and accuracy of the individual findings.
- We acknowledge that as a review of trials only, not all research pertaining to maternal health is captured, and that other study designs are important to the overall body of work done in any given field.
- We also acknowledge that the nature of a scoping review means that no quality assessment of trials is undertaken, and so we cannot comment on the quality of research conducted.

## BACKGROUND

In 2017, an estimated 295,000 women died worldwide during pregnancy, childbirth or the immediate postpartum period, equivalent to 211 deaths per 100,000 live births.<sup>1</sup> While this represents a near 38% reduction from the 2000 estimates, acceleration is required to meet the global Sustainable Development Goal (SDG) target of 70 deaths per 100,000 live births by 2030.<sup>1,2</sup> Based on a 2014 systematic analysis, the leading causes of maternal death include indirect causes (27.5%), obstetric haemorrhage (27.1%), hypertensive disorders (14.0%) and sepsis (10.7%).<sup>3</sup> Maternal mortality data have consistently shown that a majority of maternal deaths occur in low- and middle-income countries (LMICs), with countries in Sub-Saharan Africa and Southern Asia accounting for 86% of all maternal deaths.<sup>1,4</sup> The disparity in maternal mortality between higher- and lower-income countries is a stark example of how profound inequities in the quality of healthcare services between higher- and lower-resourced settings have tragic consequences for women, families and communities.<sup>5</sup>

Robust and reliable research is a critical component of the global effort to address the global burden of maternal death and disability, the majority of which is preventable.<sup>6</sup> Recent global research prioritization exercises have been conducted to identify the most impactful research areas to drive improvements in global maternal and perinatal health outcomes.<sup>7,8</sup> For example, the World Health Organization (WHO)-led prioritisation exercise by Souza et al in 2014 identified and prioritised 190 research questions for improving global maternal and perinatal health in the period 2015 to 2025 – suggesting eight broad topics of maternal health of importance (Box 1).<sup>7</sup> A separate prioritisation exercise by Chapman et al in 2014 on reducing maternal mortality in LMICs identified 100 high priority research questions – categorised into seven key topics (Box 1).<sup>8</sup>

### Box 1. Priority maternal health topics from global prioritisation exercises

#### **Souza et al – “Maternal and perinatal health research priorities beyond 2015: an international survey and prioritization exercise”<sup>7</sup>**

Questions identified by a reference group of experts and refined by a technical working group were given a score based on 5 criteria. Questions were given a normalised research priority score (NRPS) to determine the highest priority topics, which were as follows:

1. Labour and delivery
2. Obstetric haemorrhage
3. Neonatal care
4. Hypertensive disorders of pregnancy
5. Antenatal care
6. Abortion
7. Health systems
8. Other

#### **Chapman et al – “A survey study identified global research priorities for decreasing maternal mortality”<sup>8</sup>**

An initial list of questions derived from 178 Cochrane systematic reviews were prioritised and refined into a list of 100 questions. Thematic analysis of these questions was used to determine rank of priority by weighting within the set, with the following list of topics:

1. Health systems and policy
1. Diabetes and other causes\*
3. Abortion and unplanned pregnancy
4. Postpartum haemorrhage
5. Hypertensive disorders
6. Labour and caesarean

*\*Including HIV, malaria, anaemia, and violence*

#### **Say et al - “Global causes of maternal death: a WHO systematic analysis”<sup>3</sup>**

A WHO working group analysed specialised and general bibliographic databases, as well as the WHO mortality database for vital registration data, to identify and report estimated causes of maternal death between 2003 and 2012. Their work found that in the ‘developing regions’, the leading causes of maternal death were:

1. Obstetric haemorrhage (27.1%)
2. Pre-existing medical conditions (14.8%)
3. Hypertensive disorders (14.0%)
4. Other (11.2%)
5. Sepsis (10.7%)

6. Abortion (7.9%)
7. HIV-related (5.5%)
8. Embolism (3.1%)
9. Obstructed labour (2.9%)
10. Complications of delivery (2.8%)

Randomised controlled trials are the preferred study design for assessing effectiveness of interventions such as medicines.<sup>9</sup> They can also be used to evaluate effectiveness of more complex interventions, such as changes in health system arrangements.<sup>10</sup> A 2016 scoping review conducted by Chersich et al – which searched for maternal health intervention research conducted in LMICs on five key conditions – observed a marked rise in the number of trials published on maternal health topics between 2000 and 2012.<sup>11</sup> However, it is not known whether these trials are aligned with the major causes of maternal deaths, or aligned with the priority topics identified in global research prioritisation exercises. To our knowledge no such review has been undertaken across all aspects of maternal health. As such, we sought to identify and assess all published maternal health trials conducted in LMICs in the past 10 years to identify the overall trends, and to what degree this research addresses established maternal mortality burden and research priorities.

## METHODS

We elected to use a scoping review design as it is the preferred methodology for examining the scope, content, and knowledge gaps in a body of literature.<sup>12</sup> This was conducted in accordance with a pre-specified scoping review protocol registered via the Open Science Framework website.<sup>13</sup> Findings have been reported in compliance with Preferred Reporting Items for Systematic Reviews and Meta-Analyses (PRISMA) extension for scoping reviews (PRISMA-SCR).<sup>14</sup>

### Research ethics approval

As a systematic review of publicly available data, ethical approval was not required.

### Patient and public involvement

No patient's or members of the public were involved in the design, conduction, or dissemination of results for this paper.

### Eligibility criteria

1  
2  
3 We considered any trial conducted in or across any one or more LMICs to be eligible for this scoping  
4 review. LMICs were defined according to the World Bank classification of 2019, which identifies 139  
5 countries as LMICs.<sup>15</sup> Trials were eligible if they included women who were pregnant, in labour,  
6 giving birth or in the postpartum period (up to 42 days postpartum) and if they used any  
7 intervention primarily aimed at improving maternal or fetal health or preventing morbidity or  
8 mortality (i.e. the primary outcome/s of the study was related to maternal or fetal health or  
9 wellbeing). Trials published between 1 January 2010 and 31 December 2019 (inclusive) in any  
10 language were eligible. We included trials that were aimed at the maternal health system level if the  
11 primary outcome remained relevant to our population of interest. Classification of a study as a trial  
12 by the reviewers was based on Cochrane Handbook guidance.<sup>16</sup> Studies were excluded if they used  
13 quasi-randomised or non-randomised designs; had a primary outcome related to a different  
14 population (e.g., neonates or infants); were conducted in both high and low- and middle-income  
15 countries and presented only combined results (if trial results from LMICs were reported separately  
16 for LMICs and high-income countries the trial was included); or pertained to management of  
17 infertility, early pregnancy loss or abortion.

### 30 **Literature searching and assessment of eligibility**

31 With support from an information specialist, a search strategy was devised to capture eligible  
32 studies (Supplemental Table 1). Search terms for maternal and perinatal health were derived from  
33 search strategies used by Cochrane Pregnancy and Childbirth to maintain and update their  
34 specialised register.<sup>17</sup> We consulted the search filters developed by Cochrane EPOC to identify  
35 search terms relating to LMICs.<sup>18</sup> The search strategy was applied to the Cochrane Central Register  
36 of Controlled Trials (CENTRAL), which retrieves records from PubMed/MEDLINE, Embase, CINAHL,  
37 ClinicalTrials.gov, WHO's International Clinical Trials Registry Platform (ICTRP), KoreaMed, Cochrane  
38 Review Group's Specialised Registers, and hand-searched biomedical sources.<sup>19</sup> Searching CENTRAL  
39 directly had the benefit of restricting search results to trials only, keeping the volume of citations to  
40 screen to a manageable level. Trial register records from ClinicalTrials.gov and WHO ICTRP were not  
41 included in the records retrieved from CENTRAL. The search was conducted on 1 May 2020.

42 Citation management, identification of duplicates and screening articles for eligibility were  
43 conducted using EndNote<sup>20</sup> and Covidence<sup>21</sup>. Two reviewers independently screened titles and  
44 abstracts of all retrieved citations to identify those that were potentially eligible. Full texts for these  
45 articles were accessed and assessed by two independent reviewers according to the eligibility  
46  
47  
48  
49  
50  
51  
52  
53  
54  
55  
56  
57  
58  
59  
60

1  
2  
3 criteria. At both steps, any disagreements were resolved through discussion or consulting a third  
4 author.  
5  
6  
7

### 8 **Data collection and analysis**

9  
10 For each included trial we extracted information on title, author, year of publication, location where  
11 trial was conducted (country and SDG region<sup>22</sup>), unit of randomisation (individual or cluster),  
12 category of intervention, intervention level (public health, community, primary care, hospital, and  
13 health system), and category of primary outcome(s). The intervention and outcome categories were  
14 adapted from Cochrane's list of 'higher-level categories for interventions and outcomes'.<sup>23</sup> For trials  
15 with more than one primary outcome, we identified a single, most appropriate outcome category  
16 through discussion and consensus amongst review authors. The level of intervention was  
17 determined based on the level of the healthcare system that the trial was primarily targeting – for  
18 example, trials recruiting women at an antenatal clinic were classified as primary care level. Public  
19 health and preventative care were defined as interventions for those in the community who were  
20 well, while home; and community care was defined as interventions for those in the community who  
21 were unwell. Based on the trial's primary objective, we tagged each trial to one of 35 maternal  
22 health topics, as well as classifying them by relevance to a cause of maternal death identified by Say  
23 et al in their global systematic analysis (Box 1).<sup>3</sup>  
24  
25  
26  
27  
28  
29  
30  
31  
32  
33  
34

35 Included trials were additionally categorised into global research priority topics identified by Souza  
36 et al and Chapman et al.<sup>78</sup> The research priorities identified by Souza et al were ranked based on the  
37 distribution of maternal health themes across the 190 priority research questions – i.e., the theme  
38 with the most research questions was considered the highest ranked priority topic. This mirrored the  
39 process used by Chapman et al, where research topics with the greatest representation within the  
40 100 research questions, based on percentage, were given the highest rank. For each trial identified  
41 in our review, we used the variables extracted to classify it according to priority topics identified in  
42 Souza et al or Chapman et al, where possible (Box 1). All data were extracted by two independent  
43 reviewers, with results compared to ensure consistency and any disputes resolved through  
44 discussion or consultation with a third author. As this was a scoping review, we did not perform  
45 quality assessment on individual trials.  
46  
47  
48  
49  
50  
51  
52  
53  
54

55 We conducted descriptive analyses using Excel to determine frequencies of extracted variables and  
56 used line graphs to explore trends. We assessed trends over time using proportions of each variable  
57  
58  
59  
60

1  
2  
3 within studies available for a given year. While we initially planned to look at trends in individual  
4 countries and interventions, many had few or no datapoints.  
5  
6  
7  
8  
9  
10  
11  
12  
13  
14  
15  
16  
17  
18  
19  
20  
21  
22  
23  
24  
25  
26  
27  
28  
29  
30  
31  
32  
33  
34  
35  
36  
37  
38  
39  
40  
41  
42  
43  
44  
45  
46  
47  
48  
49  
50  
51  
52  
53  
54  
55  
56  
57  
58  
59  
60

For peer review only



## RESULTS

A total of 7,269 articles were identified in the search, from which 538 duplicates were removed, and 6,731 studies underwent title and abstract screening. This resulted in 1,369 articles sought for retrieval, of which 68 were not located, leaving 1,301 for assessment of eligibility. After reviewing these full texts, 874 studies were included (Figure 1). The most common reasons for exclusion were conference abstracts (136 studies) and ineligible study design (87 studies).

A total of 874 trials were included. The number of published trials conducted in LMICs steadily increased over the 10-year period – from 50 in 2010 to 114 in 2019 (Figure 2). Across all years, 2018 had the highest number of trials published (139 trials). In total, 786 (89.9%) were individually randomised trials and 88 (10.1%) were cluster-randomised trials. Trials addressed a range of health topics, the most frequent being caesarean section (81 trials, 9.3%), obstetric haemorrhage (80 trials, 9.2%), health system, resources, and infrastructure (57 trials, 6.5%), induction of labour (55 trials, 6.3%) and hypertensive disorders of pregnancy (53 trials, 6.1%). These proportions were relatively consistent over time, apart from some slight variation in trials of caesarean section (8.0% of trials in 2010, 17.1% in 2013, 9.6% in 2019) and nutrition during pregnancy (4.0% of trials in 2010, 12.4% in 2014, 4.4% in 2019).

Trials were conducted in 61 LMICs – no trials were identified from the remaining 78 LMICs (Figure 3). Iran had the highest number of trials (231 trials, 26.4%), followed by India (113 trials, 12.9%), China (58 trials, 6.6%), Egypt (47 trials, 5.4%) and Nigeria (44 trials, 5.0%). Forty countries had five or fewer trials, and 20 countries had only one trial. The SDG region with the highest number of trials was Central and Southern Asia (399 trials), accounting for nearly half of all identified trials (45.7%) (Table 1). The next highest region was Sub-Saharan Africa with 185 trials (21.2%), followed by Eastern and South-Eastern Asia with 110 trials (12.6%). Most SDG regions saw increases in the number of trials over time. For example, Eastern and South-Eastern Asia increased from 3 trials published in 2010 to 22 in 2019, while Sub-Saharan Africa increased from 9 trials published in 2010 to 33 in 2019.

**Table 1. Number and proportions of identified trials by Sustainable Development Goal region, 2010-2019**

| Sustainable Development Goals Region*          | Total number of trials | % of trials |
|------------------------------------------------|------------------------|-------------|
| <i>All</i>                                     | 874                    | 100%        |
| <b>Sub-Saharan Africa</b>                      | 185                    | 21.2%       |
| <b>Northern Africa and Western Asia</b>        | 95                     | 10.9%       |
| <b>Central and Southern Asia</b>               | 399                    | 45.7%       |
| <b>Eastern and South-Eastern Asia</b>          | 110                    | 12.6%       |
| <b>Latin America and the Caribbean</b>         | 70                     | 8.0%        |
| <b>Oceania</b>                                 | 1                      | 0.1%        |
| <b>Europe and Northern America<sup>+</sup></b> | 2                      | 0.2%        |
| <b>Multi-region<sup>^</sup></b>                | 12                     | 1.4%        |

\* SDG regions taken from the Sustainable Development Goals report, 2019<sup>2</sup>

+ Included in review due to some European countries classified as LMIC<sup>15</sup>

<sup>^</sup> Multi-region: studies that were conducted across more than 1 SDG region

Pharmacological interventions were the most frequent intervention studied, accounting for 33.8% of all trials (295 trials). Trials of complementary interventions (129 trials, 14.8%) were also common, which included interventions such as aromatherapy, acupuncture, and massage therapy. This was followed by educational interventions (90 trials, 10.3%), and nutritional and supplementary interventions (77 trials, 8.8%). Some intervention categories had few trials, hence change over time is not detectable. However, complementary interventions decreased from 18.0% of all trials published in 2010 (9/50), to 10.5% of all trials published in 2019 (12/114). Nutritional and supplementary interventions decreased from 16.0% of trials published in 2010 (8/50) to 6.1% of trials in 2019 (7/114). Conversely, educational interventions increased from 4.0% of trials published in 2010 (2/50) to 15.8% in 2019 (18/114), and resources and infrastructure interventions increased from 4.0% of trials published in 2010 (2/50) to 14.9% in 2019 (17/114).

Half of all trials within the dataset pertained to care in a health facility (448 trials, 51.3%). A further 342 trials (39.1%) were in primary care settings. The remaining trials were at health system level (60 trials, 6.9%), public health and preventative care (14 trials, 1.6%), and home and community care (10 trials, 1.1%). The proportion of trials of facility-based care decreased from 60.0% of all trials

1  
2  
3 published in 2010 (30/50) to 41.7% of all in 2019 (48/114), while trials at the health system level  
4  
5 rose from 4.0% in 2010 (2/50) to 14.8% in 2019 (17/114).  
6  
7

8 In assessing the primary outcomes of identified trials – using the predefined Cochrane list of ‘higher-  
9 level categories for interventions and outcomes’ – development of complications (124 trials, 14.2%),  
10 pain-related outcomes (92 trials, 10.5%), outcomes related to women’s knowledge, skills, or  
11 attitudes (66 trials, 7.6%), and infection-related outcomes (50 trials, 5.7%) were the most common.  
12 A large number of trials reported non-descript physiological or clinical outcomes (394 trials, 45.1%)  
13 which were categorised into the Cochrane category of ‘other physiological or clinical’. These  
14 proportions were largely consistent over time, however outcomes related to coverage of care  
15 increased from 2.0% of trials published in 2010 (1/50) to 13.2% of those in 2019 (15/114). Outcomes  
16 on woman’s knowledge, skills and attitudes increased from 0.0% of trials published in 2010 (0/50) to  
17 14.4% in 2018 (16/114), whereas development of complications decreased from 22.0% of trials  
18 published in 2010 (11/50) to 10.5% in 2019 (12/114).  
19  
20  
21  
22  
23  
24  
25  
26  
27  
28

### 29 **Comparison to causes of maternal mortality**

30 Of the 874 trials published between 2010 and 2019, 225 (25.7%) were aimed at preventing or  
31 managing one of the causes of maternal mortality. Of these 225 trials, 81 (36.0%) pertained to  
32 obstetric haemorrhage, 55 (24.4%) to hypertensive disorders, 38 (16.9%) to HIV, 23 (10.2%) to  
33 sepsis, 15 (6.7%) to complications of delivery, 10 (4.4%) to pre-existing medical conditions, and 3  
34 (1.3%) to obstructed labour. Table 2 describes each of these causes of death, comparing their  
35 percentage contribution to global maternal mortality against the percentage of these 225 trials. The  
36 largest discrepancy is in the pre-existing medical conditions category, causing 14.8% of maternal  
37 deaths but accounting for only 4.4% of trials. Haemorrhage, hypertensive disorders, complications of  
38 delivery and HIV-related causes all had higher proportions of research relative to their contribution  
39 to global maternal mortality. Despite accounting for 3.4% of maternal deaths globally, no trials on  
40 embolism were identified in our search.  
41  
42  
43  
44  
45  
46  
47  
48  
49  
50  
51  
52  
53  
54  
55  
56  
57  
58  
59  
60

**Table 2. Relationship between contribution of a cause of mortality to maternal deaths in the 'developing regions', and research output within maternal health trials in low- and middle-income countries, 2010-2019**

| Causes of maternal mortality    | Contribution to mortality in 'developing regions'* | Number of trials (% of all trials) | Percentage of trials addressing a cause of mortality (n=225) |
|---------------------------------|----------------------------------------------------|------------------------------------|--------------------------------------------------------------|
| Abortion^                       | 7.9%                                               | N/A                                | N/A                                                          |
| Embolism                        | 3.1%                                               | 0 (0.0)                            | 0.0%                                                         |
| Haemorrhage                     | 27.1%                                              | 81 (9.3)                           | 36.0%                                                        |
| Hypertensive disorders          | 14.0%                                              | 55 (6.3)                           | 24.4%                                                        |
| Sepsis                          | 10.7%                                              | 23 (2.6)                           | 10.2%                                                        |
| Complications of delivery       | 2.8%                                               | 15 (1.7)                           | 6.7%                                                         |
| Obstructed labour               | 2.9%                                               | 3 (0.3)                            | 1.3%                                                         |
| HIV-related                     | 5.5%                                               | 38 (4.3)                           | 16.9%                                                        |
| Pre-existing medical conditions | 14.8%                                              | 10 (1.1)                           | 4.4%                                                         |
| Other                           | 11.2%                                              | 649 (74.3)                         | N/A                                                          |
| <b>Total</b>                    | <b>100.0%</b>                                      | <b>874 (100.0)</b>                 | <b>100.0%</b>                                                |

\* Mortality figures were taken from the 2014 Say et al report<sup>3</sup>

^ Abortion was excluded from this review, and hence no results are reported

N/A: Not applicable

### Comparison to research priority topics

The WHO global maternal and perinatal health research prioritisation by Souza et al 2014 identified eight priority topics (Box 1).<sup>7</sup> Amongst trials included in this review, the most frequent were trials of antenatal care interventions (333 trials, 38.1%), labour and delivery interventions (292 trials, 33.4%), and trials of interventions for obstetric haemorrhage (80 trials, 9.2%), health systems (65 trials, 7.4%), hypertensive disorders of pregnancy (54 trials, 6.2%), and other (50 trials, 5.7%) (Table 3). The greatest differences between the priority topics identified in Souza et al and trials in this review was seen in antenatal care, ranked fourth priority by Souza et al but contributing the highest proportion

of research output. The remaining priorities were approximately aligned with the research output identified in this review.

**Table 3. Maternal health trials from low- and middle-income countries (2010-2019), compared to Souza et al maternal health research priority topics<sup>7</sup>**

| Research Priority topics, as ranked by Souza et al | Number of trials (% of all trials) | Rank (based on number of trials) |
|----------------------------------------------------|------------------------------------|----------------------------------|
| 1. Labour/Delivery                                 | 292 (33.4)                         | 2                                |
| 2. Obstetric haemorrhage                           | 80 (9.2)                           | 3                                |
| 3. Neonatal care*                                  | N/A                                | N/A                              |
| 4. Hypertensive disorders of pregnancy             | 54 (6.2)                           | 5                                |
| 5. Antenatal care                                  | 333 (38.1)                         | 1                                |
| 6. Abortion*                                       | N/A                                | N/A                              |
| 7. Health systems                                  | 65 (7.4)                           | 4                                |
| 8. Other                                           | 50 (5.7)                           | 6                                |
| <b>Total</b>                                       | <b>874 (100.0)</b>                 |                                  |

\* Categories were excluded from this review and hence no results are reported

N/A: Not applicable

A similar analysis was performed for the research priority topics identified by Chapman et al (Box 1).<sup>8</sup> In total, 245 trials (28.0%) were not related to one of the categories described by Chapman et al. Aside from these, the most frequent category was labour and caesarean section (292 trials, 33.4%), followed by diabetes and other causes (140 trials, 16.0%), postpartum haemorrhage (80 trials, 9.2%), health policy and systems (63 trials, 7.2%), and hypertensive disorders (54 trials, 6.2%) (Table 4). The volume of trial research was almost completely inverted against priority research topics identified by Chapman et al. For example, the lowest ranked Chapman et al priority topic (labour and delivery) accounted for the highest proportion of research output. Relatively few trials were available for some categories.

**Table 4. Maternal health trials from low- and middle-income countries (2010-2019), compared to Chapman et al maternal health research priority topics<sup>8</sup>**

| Theme, as ranked by Chapman et al                | Number of trials<br>(% of all trials) | Rank<br>(based on number of trials) |
|--------------------------------------------------|---------------------------------------|-------------------------------------|
| 1. Health policy and system                      | 63 (7.2)                              | 5                                   |
| 1. Diabetes and other causes <sup>^</sup>        | 140 (16.0)                            | 3                                   |
| 3. Abortion and unplanned pregnancy <sup>*</sup> | N/A                                   | N/A                                 |
| 4. Postpartum haemorrhage                        | 80 (9.2)                              | 4                                   |
| 5. Hypertensive disorders                        | 54 (6.2)                              | 6                                   |
| 6. Labour and caesarean                          | 292 (33.4)                            | 1                                   |
| <i>Other</i> <sup>†</sup>                        | 245 (28.0)                            | 2                                   |
| <b>Total</b>                                     | <b>874 (100.0)</b>                    |                                     |

<sup>^</sup> Other causes include HIV, Malaria, Anaemia, Violence

<sup>\*</sup> Category was excluded from this review and hence no results are reported

<sup>†</sup> Other was not a reported result from the Chapman et al paper, it has been used to capture any studies that did not fit one of the above categories

N/A: Not applicable

## DISCUSSION

### Summary of main findings

A total of 874 trials in maternal health were conducted in LMICs between 2010 and 2019, with a steady increase in trials each year until 2018. Pharmacological interventions accounted for a third of all trials. Nearly half (45.7%) of trials were conducted in Central and Southern Asian countries, and, importantly, of the 139 countries classified as LMIC<sup>15</sup>, only 61 had at least one maternal health trial over this ten-year period. Most trials were conducted at facility or primary care levels (51.3% and 39.1% respectively). Only a quarter of trials explicitly targeted one of the major causes of maternal mortality. Within these studies, trials of pre-existing medical conditions (such as cardiac or endocrine diseases<sup>3</sup>) and embolism were under-represented relative to their contribution to the global maternal mortality burden. On comparison of our findings to two global research prioritisation exercises by Souza et al and Chapman et al – gaps were identified for research priority topics such as health systems, hypertensive disorders of pregnancy, and obstetric haemorrhage. Comparatively, a substantial number of trials addressed antenatal care and labour/delivery topics. These findings suggest that trials conducted in LMICs are not well-aligned with either the burden of mortality or identified research priority topics.

### Interpretation

To our knowledge this is the first systematic scoping review to describe the characteristics of maternal health trials conducted in LMICs during 2010 to 2019. In 2016 Chersich et al published a broad review of the publication of studies (of any design) from LMICs between 2000 and 2012 on five health conditions – haemorrhage, hypertension, malaria, HIV and other sexually transmitted infections – as well as health systems strengthening.<sup>24</sup> They reported that the number of articles published per year more than doubled over this time period, from an average of 92 studies between 2000 and 2003 to 237 studies between 2008 and 2012. In line with this, the number of trials increased from 66 trials in the 2000-2003 period to 119 trials in the 2008-2012 period. However, Chersich et al reported that the proportion of studies that were trials declined due to the more rapid increase in systematic reviews, qualitative studies, and mixed-methods studies. This is broadly similar to our findings, where the number of trials had more than doubled by 2018. The apparent decrease to 114 trials in 2019 might reflect a time lag between publication and inclusion in bibliographic databases, though this is not certain. The rate of increase in published trials is similar to that described by Bornmann et al in their 2015 analysis of research studies published across all scientific fields – they reported that in recent decades the number of cited references approximately doubles every 9 years.<sup>25</sup>

1  
2  
3  
4  
5 Iran, an upper-middle income country of nearly 83 million people, was the largest country in terms  
6 of maternal health trial output, contributing over 26% of all trials. This was considerably higher than  
7 the second-largest country, India, with 13% of trials. For the period 2010 to 2019, Iran's trial output  
8 increased from 8 trials a year to a peak of 51 trials in 2018. The global trend of increasing number of  
9 trials annually was similar even when excluding trials from Iran. Interestingly, the rapid increase in  
10 Iran's output is in contrast to the Chersich et al review, which assessed studies from 2000 to 2012  
11 and did not identify Iran within the top five countries in terms of publications.<sup>24</sup> A 2019 report by  
12 Stanford University, however, identified that across all scientific fields, publication output from Iran  
13 increased dramatically from approximately 1,000 studies in 1997 to over 50,000 studies in 2018.<sup>26</sup>  
14 The authors hypothesised that an increase in graduate student numbers, combined with  
15 government policies regarding publication requirements for graduation and promotion, have driven  
16 this rapid increase.  
17  
18  
19  
20  
21  
22  
23  
24  
25  
26

27 Consistent with scoping review methodology, we did not conduct quality assessment of individual  
28 trials and are unable to determine whether there are differences in study quality across countries.  
29 However, we note that concerns regarding quality of randomized trials are increasingly frequent  
30 across a range of health areas. For example, a 2019 analysis of 1,082 retracted publications  
31 estimated that 2.5 retractions occur for every 10,000 papers globally, though this rate was highest  
32 for studies from Iran (15.52 per 10,000), Egypt (11.75 per 10,000) and China (8.26 per 10,000  
33 papers).<sup>27</sup> A separate 2019 study of retracted articles from open-access journals found that Iran was  
34 one of the top four contributors globally, alongside China, India and the USA.<sup>28</sup> In a future analysis of  
35 this database, we intend to appraise the quality of identified trials to explore possible differences.  
36  
37  
38  
39  
40  
41  
42

43 Over 90% of trials were conducted at either a facility or primary care level, a finding consistent with  
44 Chersich et al, in which only 5% of studies involved a community service component.<sup>24</sup> This is  
45 perhaps not surprising considering that trials of health system or community-wide interventions can  
46 be larger-scale and complex endeavors, and hence more challenging and resource-intensive to  
47 conduct. Conversely, our findings may reflect that the relative scarcity of community-level  
48 intervention trials is a missed opportunity, and that greater investment in such trials are warranted.  
49 Strengthening community-based approaches are particularly important in resource-limited settings  
50 where maternity care facilities and services are scarce. The increase in trials of health system level  
51 interventions from two studies in 2010 to 17 studies in 2019 is already suggestive of greater effort in  
52 evaluating more complex interventions to improve maternal health outcomes.  
53  
54  
55  
56  
57  
58  
59  
60



1  
2  
3  
4  
5 Overall, there is a substantial mismatch between the areas being addressed in trials, leading causes  
6 of maternal mortality and priority research topics. Our finding that only a quarter of trials in LMICs  
7 are addressing a cause of maternal mortality, despite the maternal death burden, indicates that  
8 greater investment and research focused on leading causes of maternal death is required,  
9 particularly on under-evaluated topics such as pre-existing medical conditions, obstructed labour,  
10 and embolism. Additionally, our finding that available trials are not closely aligned with identified  
11 priority topics suggests that more effort is needed to ensure that research activities would benefit  
12 from being better targeted to agreed global priorities.  
13  
14  
15  
16  
17  
18  
19

### 20 **Strengths and limitations**

21 We undertook a broad, inclusive search with screening in duplicate for eligible studies conducted  
22 according to a pre-specified review protocol. While it is possible that some trials were not identified,  
23 we used the Cochrane CENTRAL database of randomised trials, and hence consider the risk of  
24 missing trials to be low. While we focused this analysis on published randomized trials, we  
25 acknowledge that further insights could be gleaned from analyses of registered trial protocols on  
26 platforms such as ClinicalTrials.gov or the WHO International Clinical Trials Registry Platform. While  
27 exploring registered trial protocols was beyond the scope of this analysis, we intend to update and  
28 expand this database in the future. We acknowledge that, after extensive efforts, we were unable to  
29 locate the full text for 68 of the trials initially identified. We observed that a majority of these were  
30 from journals not currently indexed in PubMed.  
31  
32  
33  
34  
35  
36  
37  
38  
39

40 We opted to focus on randomised trials only, considering their importance in evidence-based  
41 practice and evaluating the effects of interventions. However, we acknowledge that this review is  
42 limited in that other types of study designs – non-randomised interventional studies, qualitative  
43 studies, and mixed-methods studies – are also integral to clinical research and improving maternal  
44 health outcomes globally. As such, the trends on trial publication reported here may not be  
45 applicable to trends in other types of research output. Another limitation was the exclusion of  
46 important reproductive health topics such as contraception, pre-conception health, fertility  
47 treatment and abortion, as well as care of newborns in the postnatal period. While these are  
48 important health areas, we opted to focus on antenatal, intrapartum, and postpartum care of the  
49 woman to keep this review to a manageable size and scope. A similar, future analysis of trials from  
50 LMICs on these health topics would be important in identifying whether similar trends exist.  
51  
52  
53  
54  
55  
56  
57  
58  
59  
60

### Implications for practice, policy, and research

Substantial global targets have been set for improving maternal health and well-being by 2030.<sup>29</sup> Conducting more and better trials to drive improvements in clinical care is a critical part of efforts to achieve those goals.<sup>30</sup> Our findings can guide maternal health researchers and research funding organisations to identify and address overlooked priority topics. This includes LMICs where no maternal health trials were identified, or maternal health conditions (such as pre-existing conditions) where too few trials have been conducted. Where significant numbers of trials are underway, such as individual countries or maternal health topics, reflection on the benefit and necessity of new research may provide impetus for re-alignment to areas of greater need. This database of randomized trials will be used to conduct further analyses of the maternal health trial literature, such as exploring variations in study quality between countries and over time, trial protocol registration and trial funding practices, and bibliometric analyses to identify the most impactful individuals, institutions, and collaborations.

## CONCLUSION

While the volume of maternal health trials in LMICs has steadily increased over the 10-year period from 2010 to 2019, there remains a deficit of trials addressing important causes of maternal mortality. Topics such as pre-existing medical conditions and embolism, as well as the previously identified priority topics of haemorrhage, hypertensive disorders of pregnancy, and diabetes in pregnancy, remain relatively under-represented. On a geographical level, the majority of trial output is from a small number of countries, with nearly 40% of studies emanating from only two of the 139 LMIC countries. These findings suggest that a different approach to selecting topics for trials of maternal health interventions in LMICs may be required – one where trial research is more focused on high-burden conditions and high-priority health issues. Findings can also aid researchers and funding agencies to identify current research gaps for further investment and improve allocation of resources for research.

### CONTRIBUTORSHIP STATEMENT

AE, JPV and TT developed the review protocol and data extraction tools. AE and SMcD developed the search strategy. AE and AR conducted title/abstract and full-text screening, while AE, AR, EF, WCT, JW and AA conducted data extraction. AE prepared the first draft of the analysis, which was reviewed by all authors and revised following their input. All named authors contributed to the writing of this manuscript.

### ACKNOWLEDGMENTS

None

### COMPETING INTERESTS

The authors declare no competing interests.

### FUNDING

JPV is supported by a National Health and Medical Research Council Investigator Grant (GNT1194248).

### DATA SHARING STATEMENT

Extra data can be accessed via the Dryad data repository at <http://datadryad.org/> with the doi: 10.5061/dryad.hhmgqnkj8

### FIGURES

**Figure 1.** PRISMA flow chart of screening process

**Figure 2.** Number of maternal health trials in low- and middle-income countries by year of publication (2010-2019)

**Figure 3.** Number of identified maternal health trials per low- and middle-income country

## REFERENCES

1. World Health Organization. Trends in maternal mortality 2000 to 2017: estimates by WHO, UNICEF, UNFPA, World Bank Group and the United Nations Population Division. Geneva, 2019.
2. United Nations. Sustainable Development Goals Report. New York, United States of America: United Nations, 2019.
3. Say L, Chou D, Gemmill A, et al. Global causes of maternal death: a WHO systematic analysis. *The Lancet Global health* 2014;2(6):e323-33. doi: [https://dx.doi.org/10.1016/S2214-109X\(14\)70227-X](https://dx.doi.org/10.1016/S2214-109X(14)70227-X)
4. Alkema L, Chou D, Hogan D, et al. Global, regional, and national levels and trends in maternal mortality between 1990 and 2015, with scenario-based projections to 2030: a systematic analysis by the UN Maternal Mortality Estimation Inter-Agency Group. *Lancet (London, England)* 2016;387(10017):462-74. doi: [https://dx.doi.org/10.1016/S0140-6736\(15\)00838-7](https://dx.doi.org/10.1016/S0140-6736(15)00838-7)
5. Graham W, Woodd S, Byass P, et al. Diversity and divergence: the dynamic burden of poor maternal health. *Lancet (London, England)* 2016;388(10056):2164-75. doi: [https://dx.doi.org/10.1016/S0140-6736\(16\)31533-1](https://dx.doi.org/10.1016/S0140-6736(16)31533-1)
6. World Health Organization. Strategies toward ending preventable maternal mortality (EPMM). Geneva, Switzerland: WHO, 2015.
7. Souza JP, Widmer M, Gulmezoglu AM, et al. Maternal and perinatal health research priorities beyond 2015: an international survey and prioritization exercise. *Reprod Health* 2014;11:61. doi: 10.1186/1742-4755-11-61 [published Online First: 2014/08/08]
8. Chapman E, Reveiz L, Sangalang S, et al. A survey study identified global research priorities for decreasing maternal mortality. *Journal of Clinical Epidemiology* 2014;67(3):314-24. doi: <https://doi.org/10.1016/j.jclinepi.2013.10.007>
9. CEBM. Centre for Evidence Based Medicine [cited 2020 May 1]. Available from: <https://www.cebm.net/> accessed May 1 2020.
10. Eccles M, Grimshaw J, Campbell M, et al. Research designs for studies evaluating the effectiveness of change and improvement strategies. *Qual Saf Health Care* 2003;12(1):47-52. doi: 10.1136/qhc.12.1.47 [published Online First: 2003/02/07]
11. Chersich M, Blaauw D, Dumbaugh M, et al. Mapping of research on maternal health interventions in low- and middle-income countries: a review of 2292 publications between 2000 and 2012. *Global Health* 2016;12(1):52. doi: 10.1186/s12992-016-0189-1 [published Online First: 2016/09/08]
12. Munn Z, Peters MDJ, Stern C, et al. Systematic review or scoping review? Guidance for authors when choosing between a systematic or scoping review approach. *BMC medical research methodology* 2018;18(1):143. doi: <https://dx.doi.org/10.1186/s12874-018-0611-x>
13. Eggleston AV, J.; Turner, T. Randomised trials in maternal and perinatal health in low- and middle-income countries from 2010-2019: a systematic scoping review 2020 [Available from: [osf.io/wcrph](https://osf.io/wcrph) accessed October 2 2021].
14. Tricco AC, Lillie E, Zarin W, et al. PRISMA Extension for Scoping Reviews (PRISMA-ScR): Checklist and Explanation. *Annals of internal medicine* 2018;169(7):467-73. doi: <https://dx.doi.org/10.7326/M18-0850>

15. World Bank Group. Low & middle income: The World Bank Group; 2019 [updated 2019; cited 2020 25 March]. Available from: <https://data.worldbank.org/income-level/low-and-middle-income> accessed 25 March 2020.
16. Higgins J TJ, Chandler J, Cumpston M, Li T, Page MJ, Welch VA. Cochrane Handbook for Systematic Reviews of Interventions: Cochrane, 2019.
17. Cochrane Pregnancy and Childbirth. Cochrane Pregnancy and Childbirth's Trials Register: The Cochrane Collaboration; 2020 [cited 2021 November 8]. Available from: <https://pregnancy.cochrane.org/pregnancy-and-childbirth-groups-trials-register> accessed March 2020.
18. Cochrane Effective Practice and Organisation of Care. LMIC Filters: The Cochrane Collaboration; 2020 [cited 2021 November 8]. Available from: <https://epoc.cochrane.org/lmic-filters> accessed March 2020.
19. Cochrane Library. Cochrane Central Register of Controlled Trials (CENTRAL) United Kingdom: Cochrane; 2020 [cited 2020 October 14]. Available from: <https://www.cochrane.org/contact> accessed October 14 2020.
20. Web of Science Group. EndNote USA: Clarivate; 2020 [cited 2020 October 14]. Available from: <https://endnote.com/> accessed October 14 2020.
21. Covidence. About Covidence Australia2020 [cited 2020 October 14]. Available from: <https://www.covidence.org/> accessed October 14 2020.
22. United Nations Statistics Division. SDG Indicators: Regional groupings used in Report and Statistical Annex New York, USA: United Nations; 2020 [cited 2020 June 15]. Available from: <https://unstats.un.org/sdgs/indicators/regional-groups> accessed June 15 2020.
23. Cochrane Linked Data. Metadata and vocabularies London, UK: The Cochrane Collaboration; 2020 [cited 2020 June 15]. Available from: <https://linkeddata.cochrane.org/linked-data-project/metadata-and-vocabularies> accessed June 15 2020.
24. Centre for Health Policy. Report on systematic review of health system, health promotion and clinical interventions for improving maternal health in low- and middle-income countries: MASCOT, 2013.
25. Bornmann L, Mutz R. Growth rates of modern science: A bibliometric analysis based on the number of publications and cited references. *Journal of the Association for Information Science and Technology* 2015;66(11):2215-22.
26. Sadeh S, Mirramezani M, Mesgaran MB, et al. The Scientific Output of Iran: Quantity, Quality, and Corruption. 2019
27. Campos-Varela I, Ruano-Raviña A. Misconduct as the main cause for retraction. A descriptive study of retracted publications and their authors. *Gaceta sanitaria* 2019;33:356-60.
28. Wang T, Xing Q-R, Wang H, et al. Retracted publications in the biomedical literature from open access journals. *Science and engineering ethics* 2019;25(3):855-68.
29. United Nations. Goal 3: Ensure healthy lives and promote well-being for all at all ages Geneva, Switzerland: United Nations; 2015 [cited 2020 29 April]. Available from: <https://www.un.org/sustainabledevelopment/health/> accessed 29 April 2020 2020.
30. World Health Organization, Światowa Organizacja Zdrowia. Research for Universal Health Coverage: World Health Organization 2013

1  
2  
3  
4  
5  
6  
7  
8  
9  
10  
11  
12  
13  
14  
15  
16  
17  
18  
19  
20  
21  
22  
23  
24  
25  
26  
27  
28  
29  
30  
31  
32  
33  
34  
35  
36  
37  
38  
39  
40  
41  
42  
43  
44  
45  
46  
47  
48  
49  
50  
51  
52  
53  
54  
55  
56  
57  
58  
59  
60

For peer review only

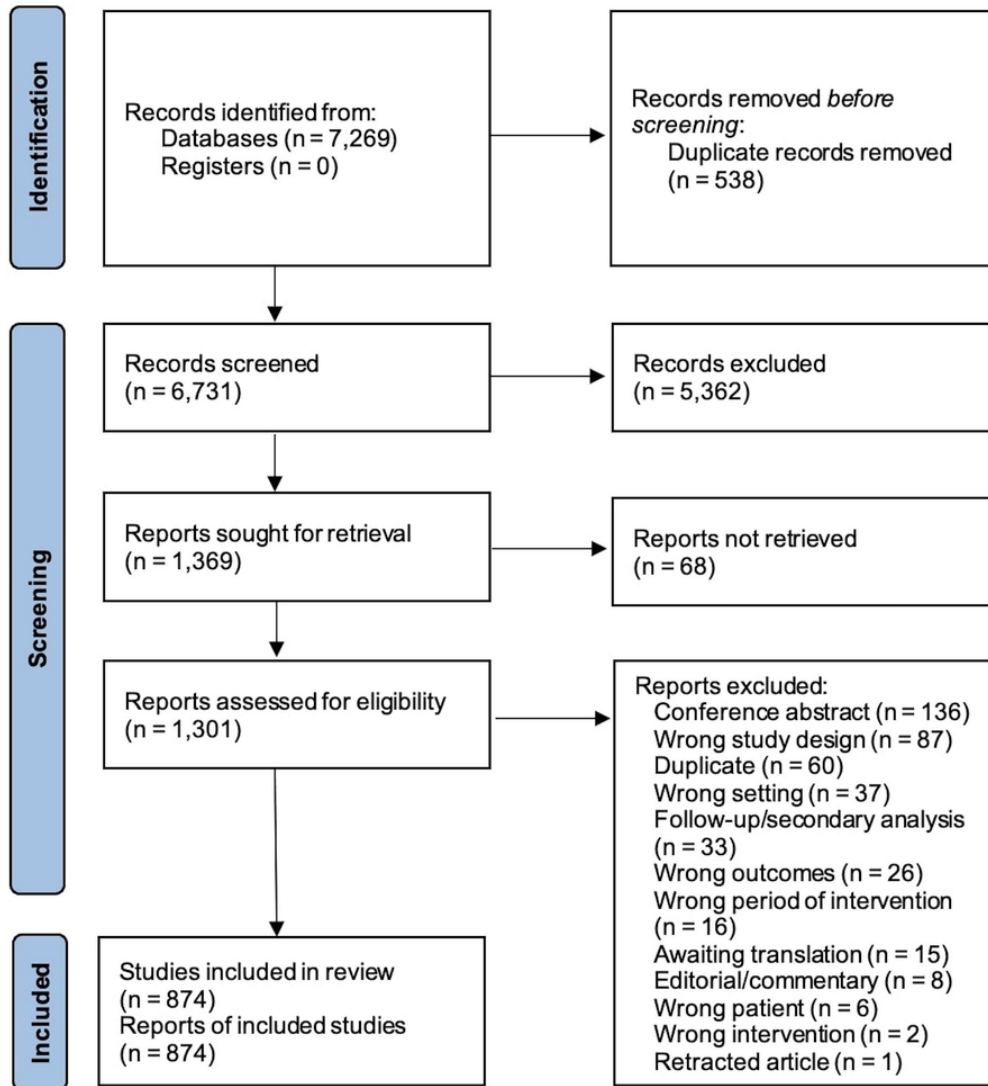

Figure 1. PRISMA Flowchart of screening process

75x82mm (300 x 300 DPI)



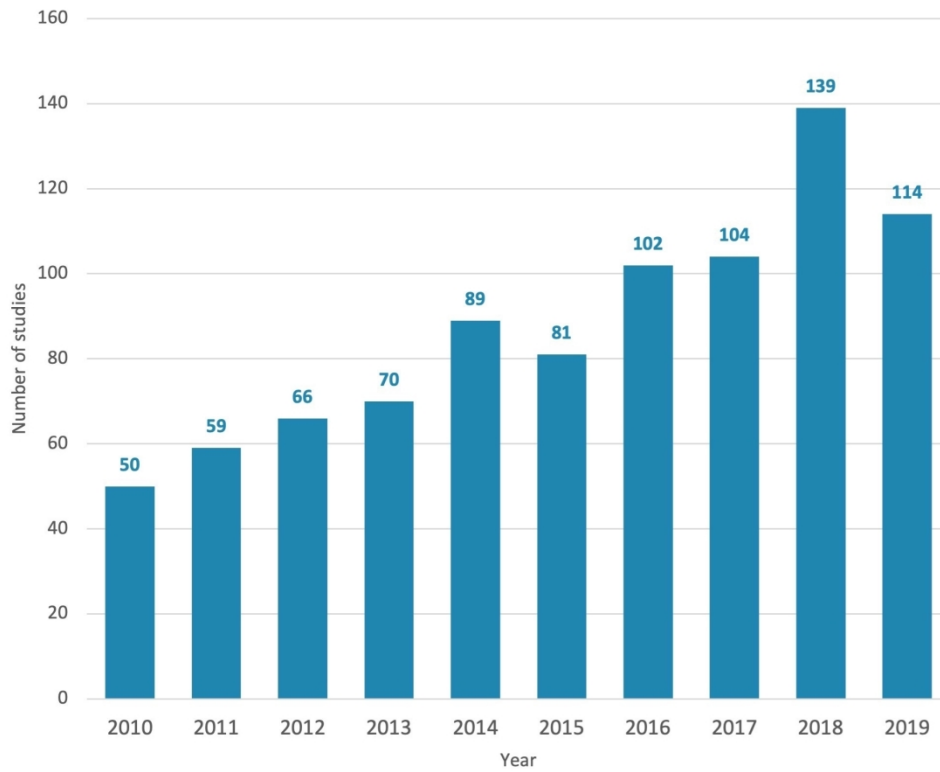

Figure 2. Number of maternal health trials in low- and middle-income countries by year of publication (2010-2019)

86x69mm (600 x 600 DPI)

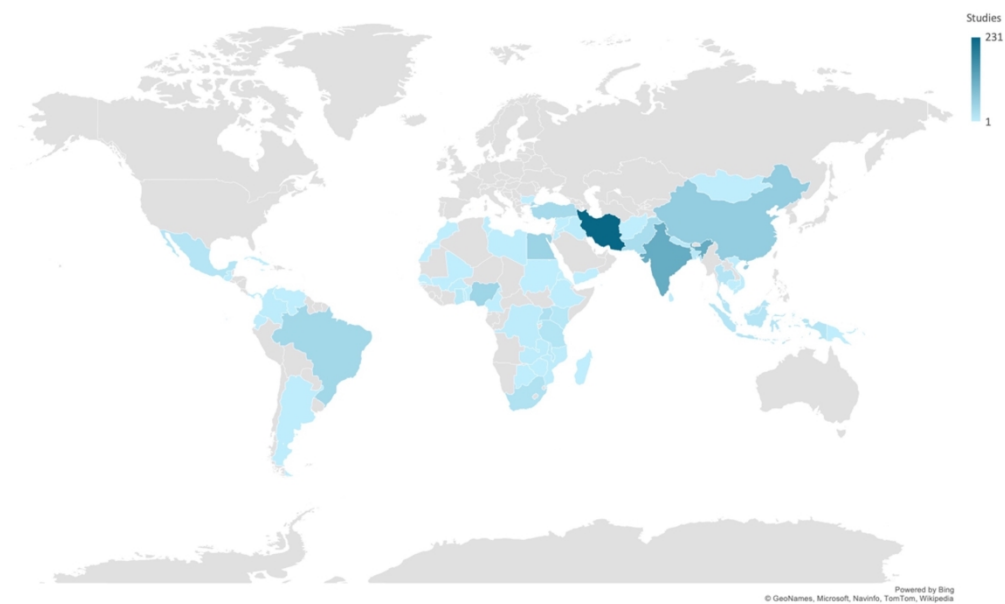

Figure 3. Number of identified maternal health trials per low- and middle-income country

140x84mm (600 x 600 DPI)

**Supplemental Table 1. Full search strategy employed to identify all maternal health trials in low- and middle-income countries. Strategy was applied to CENTRAL database on 1 May 2020**

| ID | Search                                                                                                                                                                                                                                                                                                                                                                                                                                                                                                                                                                                                                                                                                                                                                                                                                                                                                                         |
|----|----------------------------------------------------------------------------------------------------------------------------------------------------------------------------------------------------------------------------------------------------------------------------------------------------------------------------------------------------------------------------------------------------------------------------------------------------------------------------------------------------------------------------------------------------------------------------------------------------------------------------------------------------------------------------------------------------------------------------------------------------------------------------------------------------------------------------------------------------------------------------------------------------------------|
| #1 | ((Afghanistan or Albania or Algeria or Angola or Antigua or Barbuda or Argentina or Armenia or Armenian or Aruba or Azerbaijan or Bahrain or Bangladesh or Barbados or Benin or Byelarus or Byelorussian or Belarus or Belorussian or Belorussia or Belize or Bhutan or Bolivia or Bosnia or Herzegovina or Hercegovina or Botswana or Brasil or Brazil or Bulgaria or "Burkina Faso" or "Burkina Fasso" or "Upper Volta" or Burundi or Urundi or Cambodia or "Khmer Republic" or Kampuchea or Cameroon or Cameroons or Cameron or Camerons or "Cape Verde" or "Central African Republic" or Chad or Chile or China or Colombia or Comoros or "Comoro Islands" or Comores or Mayotte or Congo or Zaire or "Costa Rica" or "Cote d'Ivoire" or "Ivory Coast" or Croatia or Cuba or Cyprus or Czechoslovakia or "Czech Republic" or Slovakia or "Slovak Republic")):ti,ab,kw (Word variations have been searched) |
| #2 | ((Africa or Asia or Caribbean or "West Indies" or "South America" or "Latin America" or "Central America")):ti,ab,kw (Word variations have been searched)                                                                                                                                                                                                                                                                                                                                                                                                                                                                                                                                                                                                                                                                                                                                                      |
| #3 | ((Djibouti or "French Somaliland" or Dominica or "Dominican Republic" or "East Timor" or "East Timur" or "Timor Leste" or Ecuador or Egypt or "United Arab Republic" or "El Salvador" or Eritrea or Estonia or Ethiopia or Fiji or Gabon or "Gabonese Republic" or Gambia or Gaza or Georgia or Georgian or Ghana or "Gold Coast" or Greece or Grenada or Guatemala or Guinea or Guam or Guiana or Guyana or Haiti or Honduras or Hungary or India or Maldives or Indonesia or Iran or Iraq or "Isle of Man" or Jamaica or Jordan or Kazakhstan or Kazakh or Kenya or Kiribati or Korea or Kosovo or Kyrgyzstan or Kirghizia or "Kyrgyz Republic" or Kirghiz or Kirgizstan or "Lao PDR" or Laos or Latvia or Lebanon or Lesotho or Basutoland or Liberia or Libya or Lithuania)):ti,ab,kw                                                                                                                      |
| #4 | ((Macedonia or Madagascar or "Malagasy Republic" or Malaysia or Malaya or Malay or Sabah or Sarawak or Malawi or Nyasaland or Mali or Malta or "Marshall Islands" or Mauritania or Mauritius or "Agalega Islands" or Mexico or Micronesia or "Middle East" or Moldova or Moldovia or Moldovian or Mongolia or Montenegro or Morocco or Ifni or Mozambique or Myanmar or Myanma or Burma or Namibia or Nepal or "Netherlands Antilles" or "New Caledonia" or Nicaragua or Niger or Nigeria or "Northern Mariana Islands" or Oman or Muscat or Pakistan or Palau or Palestine or                                                                                                                                                                                                                                                                                                                                 |

|     |                                                                                                                                                                                                                                                                                                                                                                                                                                                                                                                                                                                                                                                                                                                                                                                                                                                                                                                                                                                        |
|-----|----------------------------------------------------------------------------------------------------------------------------------------------------------------------------------------------------------------------------------------------------------------------------------------------------------------------------------------------------------------------------------------------------------------------------------------------------------------------------------------------------------------------------------------------------------------------------------------------------------------------------------------------------------------------------------------------------------------------------------------------------------------------------------------------------------------------------------------------------------------------------------------------------------------------------------------------------------------------------------------|
|     | Panama or Paraguay or Peru or Philippines or Philipines or Phillipines or Phillippines or Poland or Portugal or "Puerto Rico")):ti,ab,kw                                                                                                                                                                                                                                                                                                                                                                                                                                                                                                                                                                                                                                                                                                                                                                                                                                               |
| #5  | ((Romania or Rumania or Roumania or Russia or Russian or Rwanda or Ruanda or "Saint Kitts" or "St Kitts" or Nevis or "Saint Lucia" or "St Lucia" or "Saint Vincent" or "St Vincent" or Grenadines or Samoa or "Samoa Islands" or "Navigator Island" or "Navigator Islands" or "Sao Tome" or "Saudi Arabia" or Senegal or Serbia or Montenegro or Seychelles or "Sierra Leone" or Slovenia or "Sri Lanka" or Ceylon or "Solomon Islands" or Somalia or Sudan or Suriname or Surinam or Swaziland or Syria or Tajikistan or Tadjhikistan or Tadjikistan or Tadjhik or Tanzania or Thailand or Togo or "Togolese Republic" or Tonga or Trinidad or Tobago or Tunisia or Turkey or Turkmenistan or Turkmen or Uganda or Ukraine or Uruguay or USSR or "Soviet Union" or "Union of Soviet Socialist Republics" or Uzbekistan or Uzbek or Vanuatu or "New Hebrides" or Venezuela or Vietnam or "Viet Nam" or "West Bank" or Yemen or Yugoslavia or Zambia or Zimbabwe or Rhodesia)):ti,ab,kw |
| #6  | ((developing or less* NEXT developed or "under developed" or underdeveloped or "middle income" or low* NEXT income or underserved or "under served" or deprived or poor*) NEXT (countr* or nation* or population* or world)):ti,ab,kw                                                                                                                                                                                                                                                                                                                                                                                                                                                                                                                                                                                                                                                                                                                                                  |
| #7  | ((developing or less* NEXT developed or "under developed" or underdeveloped or "middle income" or low* NEXT income) NEXT (economy or economies)):ti,ab,kw                                                                                                                                                                                                                                                                                                                                                                                                                                                                                                                                                                                                                                                                                                                                                                                                                              |
| #8  | (low* NEXT (gdp or gnp or "gross domestic" or "gross national")):ti,ab,kw                                                                                                                                                                                                                                                                                                                                                                                                                                                                                                                                                                                                                                                                                                                                                                                                                                                                                                              |
| #9  | ((low NEAR/3 middle NEAR/3 countr*)):ti,ab,kw                                                                                                                                                                                                                                                                                                                                                                                                                                                                                                                                                                                                                                                                                                                                                                                                                                                                                                                                          |
| #10 | ((lmic or lmics or "third world" or "lami country" or "lami countries")):ti,ab,kw                                                                                                                                                                                                                                                                                                                                                                                                                                                                                                                                                                                                                                                                                                                                                                                                                                                                                                      |
| #11 | ((("transitional country" or "transitional countries")):ti,ab,kw                                                                                                                                                                                                                                                                                                                                                                                                                                                                                                                                                                                                                                                                                                                                                                                                                                                                                                                       |
| #12 | (#1 OR #2 OR #3 OR #4 OR #5 OR #6 OR #7 OR #8 OR #9 OR #10 OR #11)                                                                                                                                                                                                                                                                                                                                                                                                                                                                                                                                                                                                                                                                                                                                                                                                                                                                                                                     |
| #13 | "Pregnancy and Childbirth":crg (Word variations have been searched)                                                                                                                                                                                                                                                                                                                                                                                                                                                                                                                                                                                                                                                                                                                                                                                                                                                                                                                    |
| #14 | #12 and #13 with Publication Year from 2009 to 2019, in Trials                                                                                                                                                                                                                                                                                                                                                                                                                                                                                                                                                                                                                                                                                                                                                                                                                                                                                                                         |
| #15 | MeSH descriptor: <sup>17</sup> explode all trees                                                                                                                                                                                                                                                                                                                                                                                                                                                                                                                                                                                                                                                                                                                                                                                                                                                                                                                                       |
| #16 | MeSH descriptor: [Pregnancy Complications] explode all trees                                                                                                                                                                                                                                                                                                                                                                                                                                                                                                                                                                                                                                                                                                                                                                                                                                                                                                                           |
| #17 | MeSH descriptor: [Infant, Newborn] explode all trees                                                                                                                                                                                                                                                                                                                                                                                                                                                                                                                                                                                                                                                                                                                                                                                                                                                                                                                                   |
| #18 | MeSH descriptor: [Fetus] explode all trees                                                                                                                                                                                                                                                                                                                                                                                                                                                                                                                                                                                                                                                                                                                                                                                                                                                                                                                                             |
| #19 | MeSH descriptor: [Fetal Development] explode all trees                                                                                                                                                                                                                                                                                                                                                                                                                                                                                                                                                                                                                                                                                                                                                                                                                                                                                                                                 |
| #20 | MeSH descriptor: [Heart Rate, Fetal] explode all trees                                                                                                                                                                                                                                                                                                                                                                                                                                                                                                                                                                                                                                                                                                                                                                                                                                                                                                                                 |
| #21 | MeSH descriptor: [Extraembryonic Membranes] explode all trees                                                                                                                                                                                                                                                                                                                                                                                                                                                                                                                                                                                                                                                                                                                                                                                                                                                                                                                          |
| #22 | MeSH descriptor: [Placenta] explode all trees                                                                                                                                                                                                                                                                                                                                                                                                                                                                                                                                                                                                                                                                                                                                                                                                                                                                                                                                          |

|    |                                                                                                                                                                                                                                                                                                                                                                                                                                                                                                         |
|----|---------------------------------------------------------------------------------------------------------------------------------------------------------------------------------------------------------------------------------------------------------------------------------------------------------------------------------------------------------------------------------------------------------------------------------------------------------------------------------------------------------|
| 1  |                                                                                                                                                                                                                                                                                                                                                                                                                                                                                                         |
| 2  |                                                                                                                                                                                                                                                                                                                                                                                                                                                                                                         |
| 3  |                                                                                                                                                                                                                                                                                                                                                                                                                                                                                                         |
| 4  |                                                                                                                                                                                                                                                                                                                                                                                                                                                                                                         |
| 5  |                                                                                                                                                                                                                                                                                                                                                                                                                                                                                                         |
| 6  |                                                                                                                                                                                                                                                                                                                                                                                                                                                                                                         |
| 7  |                                                                                                                                                                                                                                                                                                                                                                                                                                                                                                         |
| 8  |                                                                                                                                                                                                                                                                                                                                                                                                                                                                                                         |
| 9  |                                                                                                                                                                                                                                                                                                                                                                                                                                                                                                         |
| 10 |                                                                                                                                                                                                                                                                                                                                                                                                                                                                                                         |
| 11 |                                                                                                                                                                                                                                                                                                                                                                                                                                                                                                         |
| 12 |                                                                                                                                                                                                                                                                                                                                                                                                                                                                                                         |
| 13 |                                                                                                                                                                                                                                                                                                                                                                                                                                                                                                         |
| 14 |                                                                                                                                                                                                                                                                                                                                                                                                                                                                                                         |
| 15 |                                                                                                                                                                                                                                                                                                                                                                                                                                                                                                         |
| 16 |                                                                                                                                                                                                                                                                                                                                                                                                                                                                                                         |
| 17 |                                                                                                                                                                                                                                                                                                                                                                                                                                                                                                         |
| 18 |                                                                                                                                                                                                                                                                                                                                                                                                                                                                                                         |
| 19 |                                                                                                                                                                                                                                                                                                                                                                                                                                                                                                         |
| 20 |                                                                                                                                                                                                                                                                                                                                                                                                                                                                                                         |
| 21 |                                                                                                                                                                                                                                                                                                                                                                                                                                                                                                         |
| 22 |                                                                                                                                                                                                                                                                                                                                                                                                                                                                                                         |
| 23 |                                                                                                                                                                                                                                                                                                                                                                                                                                                                                                         |
| 24 |                                                                                                                                                                                                                                                                                                                                                                                                                                                                                                         |
| 25 |                                                                                                                                                                                                                                                                                                                                                                                                                                                                                                         |
| 26 |                                                                                                                                                                                                                                                                                                                                                                                                                                                                                                         |
| 27 |                                                                                                                                                                                                                                                                                                                                                                                                                                                                                                         |
| 28 |                                                                                                                                                                                                                                                                                                                                                                                                                                                                                                         |
| 29 |                                                                                                                                                                                                                                                                                                                                                                                                                                                                                                         |
| 30 |                                                                                                                                                                                                                                                                                                                                                                                                                                                                                                         |
| 31 |                                                                                                                                                                                                                                                                                                                                                                                                                                                                                                         |
| 32 |                                                                                                                                                                                                                                                                                                                                                                                                                                                                                                         |
| 33 |                                                                                                                                                                                                                                                                                                                                                                                                                                                                                                         |
| 34 |                                                                                                                                                                                                                                                                                                                                                                                                                                                                                                         |
| 35 |                                                                                                                                                                                                                                                                                                                                                                                                                                                                                                         |
| 36 |                                                                                                                                                                                                                                                                                                                                                                                                                                                                                                         |
| 37 |                                                                                                                                                                                                                                                                                                                                                                                                                                                                                                         |
| 38 |                                                                                                                                                                                                                                                                                                                                                                                                                                                                                                         |
| 39 |                                                                                                                                                                                                                                                                                                                                                                                                                                                                                                         |
| 40 |                                                                                                                                                                                                                                                                                                                                                                                                                                                                                                         |
| 41 |                                                                                                                                                                                                                                                                                                                                                                                                                                                                                                         |
| 42 |                                                                                                                                                                                                                                                                                                                                                                                                                                                                                                         |
| 43 |                                                                                                                                                                                                                                                                                                                                                                                                                                                                                                         |
| 44 |                                                                                                                                                                                                                                                                                                                                                                                                                                                                                                         |
| 45 |                                                                                                                                                                                                                                                                                                                                                                                                                                                                                                         |
| 46 |                                                                                                                                                                                                                                                                                                                                                                                                                                                                                                         |
| 47 |                                                                                                                                                                                                                                                                                                                                                                                                                                                                                                         |
| 48 |                                                                                                                                                                                                                                                                                                                                                                                                                                                                                                         |
| 49 |                                                                                                                                                                                                                                                                                                                                                                                                                                                                                                         |
| 50 |                                                                                                                                                                                                                                                                                                                                                                                                                                                                                                         |
| 51 |                                                                                                                                                                                                                                                                                                                                                                                                                                                                                                         |
| 52 |                                                                                                                                                                                                                                                                                                                                                                                                                                                                                                         |
| 53 |                                                                                                                                                                                                                                                                                                                                                                                                                                                                                                         |
| 54 |                                                                                                                                                                                                                                                                                                                                                                                                                                                                                                         |
| 55 |                                                                                                                                                                                                                                                                                                                                                                                                                                                                                                         |
| 56 |                                                                                                                                                                                                                                                                                                                                                                                                                                                                                                         |
| 57 |                                                                                                                                                                                                                                                                                                                                                                                                                                                                                                         |
| 58 |                                                                                                                                                                                                                                                                                                                                                                                                                                                                                                         |
| 59 |                                                                                                                                                                                                                                                                                                                                                                                                                                                                                                         |
| 60 |                                                                                                                                                                                                                                                                                                                                                                                                                                                                                                         |
|    | #23 MeSH descriptor: [Placental Function Tests] explode all trees                                                                                                                                                                                                                                                                                                                                                                                                                                       |
|    | #24 MeSH descriptor: [Uterine Monitoring] explode all trees                                                                                                                                                                                                                                                                                                                                                                                                                                             |
|    | #25 MeSH descriptor: [Pelvimetry] explode all trees                                                                                                                                                                                                                                                                                                                                                                                                                                                     |
|    | #26 MeSH descriptor: [Oxytocics] explode all trees                                                                                                                                                                                                                                                                                                                                                                                                                                                      |
|    | #27 MeSH descriptor: [Tocolytic Agents] explode all trees                                                                                                                                                                                                                                                                                                                                                                                                                                               |
|    | #28 MeSH descriptor: [Tocolysis] explode all trees                                                                                                                                                                                                                                                                                                                                                                                                                                                      |
|    | #29 MeSH descriptor: [Maternal Health Services] explode all trees                                                                                                                                                                                                                                                                                                                                                                                                                                       |
|    | #30 MeSH descriptor: [Peripartum Period] explode all trees                                                                                                                                                                                                                                                                                                                                                                                                                                              |
|    | #31 MeSH descriptor: [Parity] explode all trees                                                                                                                                                                                                                                                                                                                                                                                                                                                         |
|    | #32 MeSH descriptor: [Perinatal Care] explode all trees                                                                                                                                                                                                                                                                                                                                                                                                                                                 |
|    | #33 MeSH descriptor: [Postpartum Period] explode all trees                                                                                                                                                                                                                                                                                                                                                                                                                                              |
|    | #34 MeSH descriptor: [Labor Pain] explode all trees                                                                                                                                                                                                                                                                                                                                                                                                                                                     |
|    | #35 MeSH descriptor: [Anesthesia, Obstetrical] explode all trees                                                                                                                                                                                                                                                                                                                                                                                                                                        |
|    | #36 MeSH descriptor: [Obstetric Surgical Procedures] explode all trees                                                                                                                                                                                                                                                                                                                                                                                                                                  |
|    | #37 MeSH descriptor: [Analgesia, Obstetrical] explode all trees                                                                                                                                                                                                                                                                                                                                                                                                                                         |
|    | #38 MeSH descriptor: [Obstetric Nursing] explode all trees                                                                                                                                                                                                                                                                                                                                                                                                                                              |
|    | #39 MeSH descriptor: [Maternal-Child Nursing] explode all trees                                                                                                                                                                                                                                                                                                                                                                                                                                         |
|    | #40 MeSH descriptor: [Midwifery] explode all trees                                                                                                                                                                                                                                                                                                                                                                                                                                                      |
|    | #41 MeSH descriptor: [Apgar Score] explode all trees                                                                                                                                                                                                                                                                                                                                                                                                                                                    |
|    | #42 MeSH descriptor: [Breast Feeding] explode all trees                                                                                                                                                                                                                                                                                                                                                                                                                                                 |
|    | #43 MeSH descriptor: [Bottle Feeding] explode all trees                                                                                                                                                                                                                                                                                                                                                                                                                                                 |
|    | #44 MeSH descriptor: [Milk, Human] explode all trees                                                                                                                                                                                                                                                                                                                                                                                                                                                    |
|    | #45 {OR #15-#44}                                                                                                                                                                                                                                                                                                                                                                                                                                                                                        |
|    | #46 (pregnan* or fetus or foetus or fetal or foetal or newborn or "new born" or birth or childbirth or laboring or labour* or antepart* or prenatal* or antenatal* or perinatal* or postnatal* or postpart* or caesar* or cesar* or obstetric* or tocoly* or oxytoci* or placent* or parturi* or preeclamp* or eclamp* or intrapart* or puerper* or episiotom* or amnio* or matern* or gestation* or lactati* or breastfe* or breast NEXT fe* or preconcept* or periconcept* or interconcept*):ti,ab,kw |
|    | #47 #45 OR #46                                                                                                                                                                                                                                                                                                                                                                                                                                                                                          |
|    | #48 (PubMed):an                                                                                                                                                                                                                                                                                                                                                                                                                                                                                         |
|    | #49 (Embase):an                                                                                                                                                                                                                                                                                                                                                                                                                                                                                         |
|    | #50 (CTgov):an                                                                                                                                                                                                                                                                                                                                                                                                                                                                                          |

|     |                                                                                           |
|-----|-------------------------------------------------------------------------------------------|
| #51 | (ICTRP):an                                                                                |
| #52 | #12 AND #45 AND #48 with Publication Year from 2010 to 2019, in Trials                    |
| #53 | #48 OR #49 OR #50 OR #51                                                                  |
| #54 | (pregnan*):kw                                                                             |
| #55 | (#12 AND #54 AND #49) NOT #52 with Publication Year from 2010 to 2019, in Trials          |
| #56 | (#12 AND #47 AND #49) NOT (#52 OR #55) with Publication Year from 2010 to 2019, in Trials |
| #57 | (#12 AND #47) NOT #53 with Publication Year from 2010 to 2019, in Trials                  |
| #58 | #52 OR #55 OR #56 OR #57 with Publication Year from 2010 to 2019, in Trials               |

### Notes on the search

The search was run in phases to prioritise screening. The final set (#58) comprised MeSH and free-text terms related to LMICs (#12) with a publication year of 2010–2019, separated into the following phases:

|              |                                                                        |             |
|--------------|------------------------------------------------------------------------|-------------|
| #52          | PubMed records indexed with relevant MeSH terms for pregnancy          | 2606        |
| #55          | Embase records indexed with pregnan* as a keyword term                 | 1883        |
| #56          | PubMed or Embase records with relevant free-text terms for pregnancy   | 2617        |
| #57          | Records from other sources with relevant free-text terms for pregnancy | 213         |
| <b>Total</b> |                                                                        | <b>7269</b> |

Trial register records from ClinicalTrials.gov and WHO ICTRP were not included in the retrieved records.

## Preferred Reporting Items for Systematic reviews and Meta-Analyses extension for Scoping Reviews (PRISMA-ScR) Checklist

| SECTION                                               | ITEM | PRISMA-ScR CHECKLIST ITEM                                                                                                                                                                                                                                                                                  | REPORTED ON PAGE # |
|-------------------------------------------------------|------|------------------------------------------------------------------------------------------------------------------------------------------------------------------------------------------------------------------------------------------------------------------------------------------------------------|--------------------|
| <b>TITLE</b>                                          |      |                                                                                                                                                                                                                                                                                                            |                    |
| Title                                                 | 1    | Identify the report as a scoping review.                                                                                                                                                                                                                                                                   | 1                  |
| <b>ABSTRACT</b>                                       |      |                                                                                                                                                                                                                                                                                                            |                    |
| Structured summary                                    | 2    | Provide a structured summary that includes (as applicable): background, objectives, eligibility criteria, sources of evidence, charting methods, results, and conclusions that relate to the review questions and objectives.                                                                              | 2                  |
| <b>INTRODUCTION</b>                                   |      |                                                                                                                                                                                                                                                                                                            |                    |
| Rationale                                             | 3    | Describe the rationale for the review in the context of what is already known. Explain why the review questions/objectives lend themselves to a scoping review approach.                                                                                                                                   | 4-6                |
| Objectives                                            | 4    | Provide an explicit statement of the questions and objectives being addressed with reference to their key elements (e.g., population or participants, concepts, and context) or other relevant key elements used to conceptualize the review questions and/or objectives.                                  | 4-6                |
| <b>METHODS</b>                                        |      |                                                                                                                                                                                                                                                                                                            |                    |
| Protocol and registration                             | 5    | Indicate whether a review protocol exists; state if and where it can be accessed (e.g., a Web address); and if available, provide registration information, including the registration number.                                                                                                             | 6                  |
| Eligibility criteria                                  | 6    | Specify characteristics of the sources of evidence used as eligibility criteria (e.g., years considered, language, and publication status), and provide a rationale.                                                                                                                                       | 6-7                |
| Information sources*                                  | 7    | Describe all information sources in the search (e.g., databases with dates of coverage and contact with authors to identify additional sources), as well as the date the most recent search was executed.                                                                                                  | 7                  |
| Search                                                | 8    | Present the full electronic search strategy for at least 1 database, including any limits used, such that it could be repeated.                                                                                                                                                                            | SF1                |
| Selection of sources of evidence†                     | 9    | State the process for selecting sources of evidence (i.e., screening and eligibility) included in the scoping review.                                                                                                                                                                                      | 7                  |
| Data charting process‡                                | 10   | Describe the methods of charting data from the included sources of evidence (e.g., calibrated forms or forms that have been tested by the team before their use, and whether data charting was done independently or in duplicate) and any processes for obtaining and confirming data from investigators. | 8                  |
| Data items                                            | 11   | List and define all variables for which data were sought and any assumptions and simplifications made.                                                                                                                                                                                                     | 8                  |
| Critical appraisal of individual sources of evidence§ | 12   | If done, provide a rationale for conducting a critical appraisal of included sources of evidence; describe the methods used and how this information was used in any data synthesis (if appropriate).                                                                                                      | NA                 |



| SECTION                                       | ITEM | PRISMA-ScR CHECKLIST ITEM                                                                                                                                                                       | REPORTED ON PAGE # |
|-----------------------------------------------|------|-------------------------------------------------------------------------------------------------------------------------------------------------------------------------------------------------|--------------------|
| Synthesis of results                          | 13   | Describe the methods of handling and summarizing the data that were charted.                                                                                                                    | 8                  |
| <b>RESULTS</b>                                |      |                                                                                                                                                                                                 |                    |
| Selection of sources of evidence              | 14   | Give numbers of sources of evidence screened, assessed for eligibility, and included in the review, with reasons for exclusions at each stage, ideally using a flow diagram.                    | 9; Figure 1        |
| Characteristics of sources of evidence        | 15   | For each source of evidence, present characteristics for which data were charted and provide the citations.                                                                                     | 9                  |
| Critical appraisal within sources of evidence | 16   | If done, present data on critical appraisal of included sources of evidence (see item 12).                                                                                                      | NA                 |
| Results of individual sources of evidence     | 17   | For each included source of evidence, present the relevant data that were charted that relate to the review questions and objectives.                                                           | 9-14               |
| Synthesis of results                          | 18   | Summarize and/or present the charting results as they relate to the review questions and objectives.                                                                                            | 9-14               |
| <b>DISCUSSION</b>                             |      |                                                                                                                                                                                                 |                    |
| Summary of evidence                           | 19   | Summarize the main results (including an overview of concepts, themes, and types of evidence available), link to the review questions and objectives, and consider the relevance to key groups. | 15-17              |
| Limitations                                   | 20   | Discuss the limitations of the scoping review process.                                                                                                                                          | 18                 |
| Conclusions                                   | 21   | Provide a general interpretation of the results with respect to the review questions and objectives, as well as potential implications and/or next steps.                                       | 19                 |
| <b>FUNDING</b>                                |      |                                                                                                                                                                                                 |                    |
| Funding                                       | 22   | Describe sources of funding for the included sources of evidence, as well as sources of funding for the scoping review. Describe the role of the funders of the scoping review.                 | 20                 |

JB1 = Joanna Briggs Institute; PRISMA-ScR = Preferred Reporting Items for Systematic reviews and Meta-Analyses extension for Scoping Reviews.

\* Where *sources of evidence* (see second footnote) are compiled from, such as bibliographic databases, social media platforms, and Web sites.

† A more inclusive/heterogeneous term used to account for the different types of evidence or data sources (e.g., quantitative and/or qualitative research, expert opinion, and policy documents) that may be eligible in a scoping review as opposed to only studies. This is not to be confused with *information sources* (see first footnote).

‡ The frameworks by Arksey and O'Malley (6) and Levac and colleagues (7) and the JBI guidance (4, 5) refer to the process of data extraction in a scoping review as data charting.

§ The process of systematically examining research evidence to assess its validity, results, and relevance before using it to inform a decision. This term is used for items 12 and 19 instead of "risk of bias" (which is more applicable to systematic reviews of interventions) to include and acknowledge the various sources of evidence that may be used in a scoping review (e.g., quantitative and/or qualitative research, expert opinion, and policy document).

From: Tricco AC, Lillie E, Zarin W, O'Brien KK, Colquhoun H, Levac D, et al. PRISMA Extension for Scoping Reviews (PRISMAScR): Checklist and Explanation. *Ann Intern Med.* 2018;169:467–473. doi: 10.7326/M18-0850.

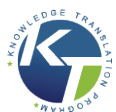

St. Michael's

Inspired Care. For peer review only - <http://bmjopen.bmj.com/site/about/guidelines.xhtml>  
Inspiring Science.
