# Supplementary material for: Randomised trials in maternal and perinatal health in low and middle-income countries from 2010 to 2019: a systematic scoping review
Source: PubMed Central journal article supplement — BMJ Open. 2022 Jul 7;12(7):e059473. doi: 10.1136/bmjopen-2021-059473 (PMC9263904; doi:10.1136/bmjopen-2021-059473), 2022-07-07
Supplement: bmjopen-2021-059473supp001.pdf [file bmjopen-2021-059473supp001.pdf]

**Supplemental Table 1. Full search strategy employed to identify all maternal health trials in low- and middle-income countries. Strategy was applied to CENTRAL database on 1 May 2020**

| ID | Search                                                                                                                                                                                                                                                                                                                                                                                                                                                                                                                                                                                                                                                                                                                                                                                                                                                                                                         |
|----|----------------------------------------------------------------------------------------------------------------------------------------------------------------------------------------------------------------------------------------------------------------------------------------------------------------------------------------------------------------------------------------------------------------------------------------------------------------------------------------------------------------------------------------------------------------------------------------------------------------------------------------------------------------------------------------------------------------------------------------------------------------------------------------------------------------------------------------------------------------------------------------------------------------|
| #1 | ((Afghanistan or Albania or Algeria or Angola or Antigua or Barbuda or Argentina or Armenia or Armenian or Aruba or Azerbaijan or Bahrain or Bangladesh or Barbados or Benin or Byelarus or Byelorussian or Belarus or Belorussian or Belorussia or Belize or Bhutan or Bolivia or Bosnia or Herzegovina or Hercegovina or Botswana or Brasil or Brazil or Bulgaria or "Burkina Faso" or "Burkina Fasso" or "Upper Volta" or Burundi or Urundi or Cambodia or "Khmer Republic" or Kampuchea or Cameroon or Cameroons or Cameron or Camerons or "Cape Verde" or "Central African Republic" or Chad or Chile or China or Colombia or Comoros or "Comoro Islands" or Comores or Mayotte or Congo or Zaire or "Costa Rica" or "Cote d'Ivoire" or "Ivory Coast" or Croatia or Cuba or Cyprus or Czechoslovakia or "Czech Republic" or Slovakia or "Slovak Republic")):ti,ab,kw (Word variations have been searched) |
| #2 | ((Africa or Asia or Caribbean or "West Indies" or "South America" or "Latin America" or "Central America")):ti,ab,kw (Word variations have been searched)                                                                                                                                                                                                                                                                                                                                                                                                                                                                                                                                                                                                                                                                                                                                                      |
| #3 | ((Djibouti or "French Somaliland" or Dominica or "Dominican Republic" or "East Timor" or "East Timur" or "Timor Leste" or Ecuador or Egypt or "United Arab Republic" or "El Salvador" or Eritrea or Estonia or Ethiopia or Fiji or Gabon or "Gabonese Republic" or Gambia or Gaza or Georgia or Georgian or Ghana or "Gold Coast" or Greece or Grenada or Guatemala or Guinea or Guam or Guiana or Guyana or Haiti or Honduras or Hungary or India or Maldives or Indonesia or Iran or Iraq or "Isle of Man" or Jamaica or Jordan or Kazakhstan or Kazakh or Kenya or Kiribati or Korea or Kosovo or Kyrgyzstan or Kirghizia or "Kyrgyz Republic" or Kirghiz or Kirgizstan or "Lao PDR" or Laos or Latvia or Lebanon or Lesotho or Basutoland or Liberia or Libya or Lithuania)):ti,ab,kw                                                                                                                      |
| #4 | ((Macedonia or Madagascar or "Malagasy Republic" or Malaysia or Malaya or Malay or Sabah or Sarawak or Malawi or Nyasaland or Mali or Malta or "Marshall Islands" or Mauritania or Mauritius or "Agalega Islands" or Mexico or Micronesia or "Middle East" or Moldova or Moldovia or Moldovian or Mongolia or Montenegro or Morocco or Ifni or Mozambique or Myanmar or Myanma or Burma or Namibia or Nepal or "Netherlands Antilles" or "New Caledonia" or Nicaragua or Niger or Nigeria or "Northern Mariana Islands" or Oman or Muscat or Pakistan or Palau or Palestine or                                                                                                                                                                                                                                                                                                                                 |

|     |                                                                                                                                                                                                                                                                                                                                                                                                                                                                                                                                                                                                                                                                                                                                                                                                                                                                                                                                                                                      |
|-----|--------------------------------------------------------------------------------------------------------------------------------------------------------------------------------------------------------------------------------------------------------------------------------------------------------------------------------------------------------------------------------------------------------------------------------------------------------------------------------------------------------------------------------------------------------------------------------------------------------------------------------------------------------------------------------------------------------------------------------------------------------------------------------------------------------------------------------------------------------------------------------------------------------------------------------------------------------------------------------------|
|     | Panama or Paraguay or Peru or Philippines or Philipines or Phillipines or Phillippines or Poland or Portugal or "Puerto Rico")):ti,ab,kw                                                                                                                                                                                                                                                                                                                                                                                                                                                                                                                                                                                                                                                                                                                                                                                                                                             |
| #5  | ((Romania or Rumania or Roumania or Russia or Russian or Rwanda or Ruanda or "Saint Kitts" or "St Kitts" or Nevis or "Saint Lucia" or "St Lucia" or "Saint Vincent" or "St Vincent" or Grenadines or Samoa or "Samoa Islands" or "Navigator Island" or "Navigator Islands" or "Sao Tome" or "Saudi Arabia" or Senegal or Serbia or Montenegro or Seychelles or "Sierra Leone" or Slovenia or "Sri Lanka" or Ceylon or "Solomon Islands" or Somalia or Sudan or Suriname or Surinam or Swaziland or Syria or Tajikistan or Tadhikistan or Tadjikistan or Tadhik or Tanzania or Thailand or Togo or "Togolese Republic" or Tonga or Trinidad or Tobago or Tunisia or Turkey or Turkmenistan or Turkmen or Uganda or Ukraine or Uruguay or USSR or "Soviet Union" or "Union of Soviet Socialist Republics" or Uzbekistan or Uzbek or Vanuatu or "New Hebrides" or Venezuela or Vietnam or "Viet Nam" or "West Bank" or Yemen or Yugoslavia or Zambia or Zimbabwe or Rhodesia)):ti,ab,kw |
| #6  | ((developing or less* NEXT developed or "under developed" or underdeveloped or "middle income" or low* NEXT income or underserved or "under served" or deprived or poor*) NEXT (countr* or nation* or population* or world)):ti,ab,kw                                                                                                                                                                                                                                                                                                                                                                                                                                                                                                                                                                                                                                                                                                                                                |
| #7  | ((developing or less* NEXT developed or "under developed" or underdeveloped or "middle income" or low* NEXT income) NEXT (economy or economies)):ti,ab,kw                                                                                                                                                                                                                                                                                                                                                                                                                                                                                                                                                                                                                                                                                                                                                                                                                            |
| #8  | (low* NEXT (gdp or gnp or "gross domestic" or "gross national")):ti,ab,kw                                                                                                                                                                                                                                                                                                                                                                                                                                                                                                                                                                                                                                                                                                                                                                                                                                                                                                            |
| #9  | ((low NEAR/3 middle NEAR/3 countr*)):ti,ab,kw                                                                                                                                                                                                                                                                                                                                                                                                                                                                                                                                                                                                                                                                                                                                                                                                                                                                                                                                        |
| #10 | ((lmic or Imics or "third world" or "lami country" or "lami countries")):ti,ab,kw                                                                                                                                                                                                                                                                                                                                                                                                                                                                                                                                                                                                                                                                                                                                                                                                                                                                                                    |
| #11 | ((("transitional country" or "transitional countries")):ti,ab,kw                                                                                                                                                                                                                                                                                                                                                                                                                                                                                                                                                                                                                                                                                                                                                                                                                                                                                                                     |
| #12 | (#1 OR #2 OR #3 OR #4 OR #5 OR #6 OR #7 OR #8 OR #9 OR #10 OR #11)                                                                                                                                                                                                                                                                                                                                                                                                                                                                                                                                                                                                                                                                                                                                                                                                                                                                                                                   |
| #13 | "Pregnancy and Childbirth":crg (Word variations have been searched)                                                                                                                                                                                                                                                                                                                                                                                                                                                                                                                                                                                                                                                                                                                                                                                                                                                                                                                  |
| #14 | #12 and #13 with Publication Year from 2009 to 2019, in Trials                                                                                                                                                                                                                                                                                                                                                                                                                                                                                                                                                                                                                                                                                                                                                                                                                                                                                                                       |
| #15 | MeSH descriptor: <sup>17</sup> explode all trees                                                                                                                                                                                                                                                                                                                                                                                                                                                                                                                                                                                                                                                                                                                                                                                                                                                                                                                                     |
| #16 | MeSH descriptor: [Pregnancy Complications] explode all trees                                                                                                                                                                                                                                                                                                                                                                                                                                                                                                                                                                                                                                                                                                                                                                                                                                                                                                                         |
| #17 | MeSH descriptor: [Infant, Newborn] explode all trees                                                                                                                                                                                                                                                                                                                                                                                                                                                                                                                                                                                                                                                                                                                                                                                                                                                                                                                                 |
| #18 | MeSH descriptor: [Fetus] explode all trees                                                                                                                                                                                                                                                                                                                                                                                                                                                                                                                                                                                                                                                                                                                                                                                                                                                                                                                                           |
| #19 | MeSH descriptor: [Fetal Development] explode all trees                                                                                                                                                                                                                                                                                                                                                                                                                                                                                                                                                                                                                                                                                                                                                                                                                                                                                                                               |
| #20 | MeSH descriptor: [Heart Rate, Fetal] explode all trees                                                                                                                                                                                                                                                                                                                                                                                                                                                                                                                                                                                                                                                                                                                                                                                                                                                                                                                               |
| #21 | MeSH descriptor: [Extraembryonic Membranes] explode all trees                                                                                                                                                                                                                                                                                                                                                                                                                                                                                                                                                                                                                                                                                                                                                                                                                                                                                                                        |
| #22 | MeSH descriptor: [Placenta] explode all trees                                                                                                                                                                                                                                                                                                                                                                                                                                                                                                                                                                                                                                                                                                                                                                                                                                                                                                                                        |

|     |                                                                                                                                                                                                                                                                                                                                                                                                                                                                                                     |
|-----|-----------------------------------------------------------------------------------------------------------------------------------------------------------------------------------------------------------------------------------------------------------------------------------------------------------------------------------------------------------------------------------------------------------------------------------------------------------------------------------------------------|
| #23 | MeSH descriptor: [Placental Function Tests] explode all trees                                                                                                                                                                                                                                                                                                                                                                                                                                       |
| #24 | MeSH descriptor: [Uterine Monitoring] explode all trees                                                                                                                                                                                                                                                                                                                                                                                                                                             |
| #25 | MeSH descriptor: [Pelvimetry] explode all trees                                                                                                                                                                                                                                                                                                                                                                                                                                                     |
| #26 | MeSH descriptor: [Oxytocics] explode all trees                                                                                                                                                                                                                                                                                                                                                                                                                                                      |
| #27 | MeSH descriptor: [Tocolytic Agents] explode all trees                                                                                                                                                                                                                                                                                                                                                                                                                                               |
| #28 | MeSH descriptor: [Tocolysis] explode all trees                                                                                                                                                                                                                                                                                                                                                                                                                                                      |
| #29 | MeSH descriptor: [Maternal Health Services] explode all trees                                                                                                                                                                                                                                                                                                                                                                                                                                       |
| #30 | MeSH descriptor: [Peripartum Period] explode all trees                                                                                                                                                                                                                                                                                                                                                                                                                                              |
| #31 | MeSH descriptor: [Parity] explode all trees                                                                                                                                                                                                                                                                                                                                                                                                                                                         |
| #32 | MeSH descriptor: [Perinatal Care] explode all trees                                                                                                                                                                                                                                                                                                                                                                                                                                                 |
| #33 | MeSH descriptor: [Postpartum Period] explode all trees                                                                                                                                                                                                                                                                                                                                                                                                                                              |
| #34 | MeSH descriptor: [Labor Pain] explode all trees                                                                                                                                                                                                                                                                                                                                                                                                                                                     |
| #35 | MeSH descriptor: [Anesthesia, Obstetrical] explode all trees                                                                                                                                                                                                                                                                                                                                                                                                                                        |
| #36 | MeSH descriptor: [Obstetric Surgical Procedures] explode all trees                                                                                                                                                                                                                                                                                                                                                                                                                                  |
| #37 | MeSH descriptor: [Analgesia, Obstetrical] explode all trees                                                                                                                                                                                                                                                                                                                                                                                                                                         |
| #38 | MeSH descriptor: [Obstetric Nursing] explode all trees                                                                                                                                                                                                                                                                                                                                                                                                                                              |
| #39 | MeSH descriptor: [Maternal-Child Nursing] explode all trees                                                                                                                                                                                                                                                                                                                                                                                                                                         |
| #40 | MeSH descriptor: [Midwifery] explode all trees                                                                                                                                                                                                                                                                                                                                                                                                                                                      |
| #41 | MeSH descriptor: [Apgar Score] explode all trees                                                                                                                                                                                                                                                                                                                                                                                                                                                    |
| #42 | MeSH descriptor: [Breast Feeding] explode all trees                                                                                                                                                                                                                                                                                                                                                                                                                                                 |
| #43 | MeSH descriptor: [Bottle Feeding] explode all trees                                                                                                                                                                                                                                                                                                                                                                                                                                                 |
| #44 | MeSH descriptor: [Milk, Human] explode all trees                                                                                                                                                                                                                                                                                                                                                                                                                                                    |
| #45 | {OR #15-#44}                                                                                                                                                                                                                                                                                                                                                                                                                                                                                        |
| #46 | (pregnan* or fetus or foetus or fetal or foetal or newborn or "new born" or birth or childbirth or laboring or labour* or antepart* or prenatal* or antenatal* or perinatal* or postnatal* or postpart* or caesar* or cesar* or obstetric* or tocoly* or oxytoci* or placent* or parturi* or preeclamp* or eclamp* or intrapart* or puerper* or episiotom* or amnio* or matern* or gestation* or lactati* or breastfe* or breast NEXT fe* or preconcept* or periconcept* or interconcept*):ti,ab,kw |
| #47 | #45 OR #46                                                                                                                                                                                                                                                                                                                                                                                                                                                                                          |
| #48 | (PubMed):an                                                                                                                                                                                                                                                                                                                                                                                                                                                                                         |
| #49 | (Embase):an                                                                                                                                                                                                                                                                                                                                                                                                                                                                                         |
| #50 | (CTgov):an                                                                                                                                                                                                                                                                                                                                                                                                                                                                                          |

|     |                                                                                           |
|-----|-------------------------------------------------------------------------------------------|
| #51 | (ICTRP):an                                                                                |
| #52 | #12 AND #45 AND #48 with Publication Year from 2010 to 2019, in Trials                    |
| #53 | #48 OR #49 OR #50 OR #51                                                                  |
| #54 | (pregnan*):kw                                                                             |
| #55 | (#12 AND #54 AND #49) NOT #52 with Publication Year from 2010 to 2019, in Trials          |
| #56 | (#12 AND #47 AND #49) NOT (#52 OR #55) with Publication Year from 2010 to 2019, in Trials |
| #57 | (#12 AND #47) NOT #53 with Publication Year from 2010 to 2019, in Trials                  |
| #58 | #52 OR #55 OR #56 OR #57 with Publication Year from 2010 to 2019, in Trials               |

### Notes on the search

The search was run in phases to prioritise screening. The final set (#58) comprised MeSH and free-text terms related to LMICs (#12) with a publication year of 2010–2019, separated into the following phases:

|              |                                                                        |             |
|--------------|------------------------------------------------------------------------|-------------|
| #52          | PubMed records indexed with relevant MeSH terms for pregnancy          | 2606        |
| #55          | Embase records indexed with pregnan* as a keyword term                 | 1883        |
| #56          | PubMed or Embase records with relevant free-text terms for pregnancy   | 2617        |
| #57          | Records from other sources with relevant free-text terms for pregnancy | 213         |
| <b>Total</b> |                                                                        | <b>7269</b> |

Trial register records from ClinicalTrials.gov and WHO ICTRP were not included in the retrieved records.
